# Supplementary material for: Efficacy of Music Intervention for Dental Anxiety Disorders: A Systematic Review and Meta-Analysis
Source: MDPI journal article supplement (doi:10.3390/medicina59020209), 2023-01-20

## 1. Heart Rate (HR)

### 1.1 HR Change

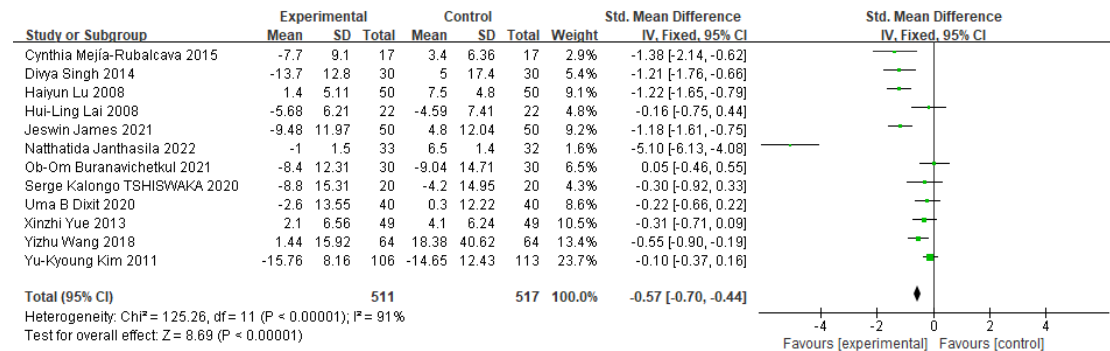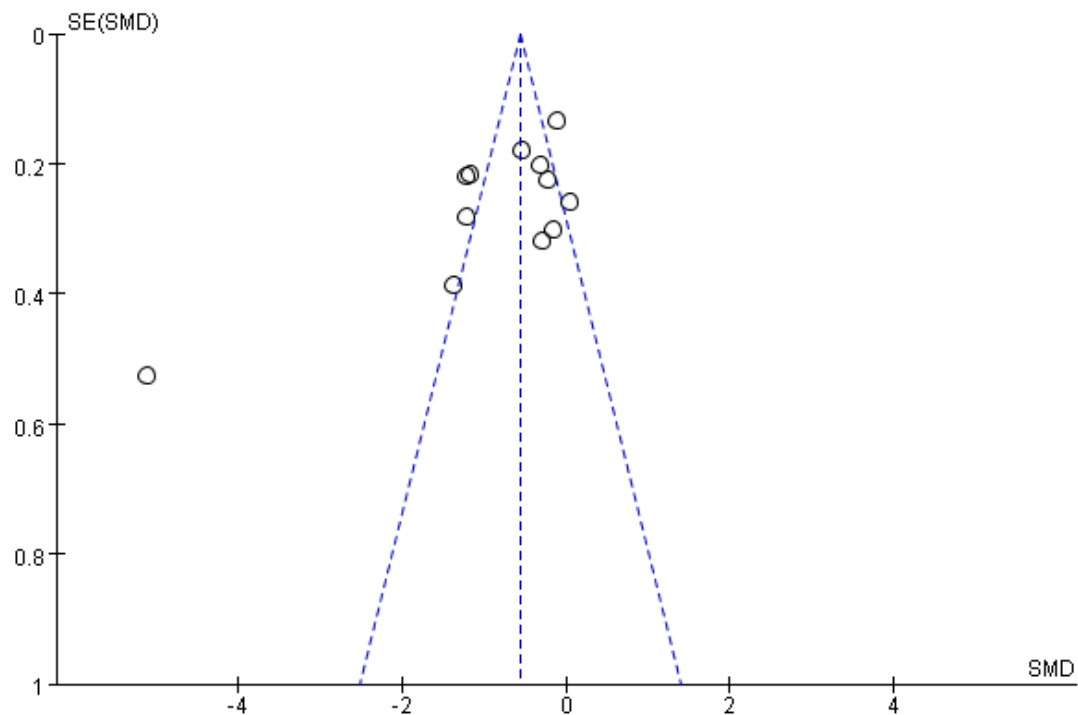

## 2. Systolic Blood Pressure (SBP)

### 2.1 Preoperative SBP

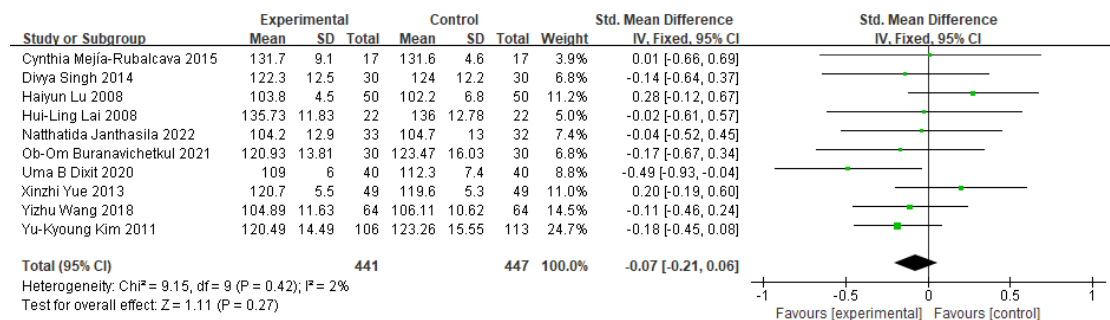

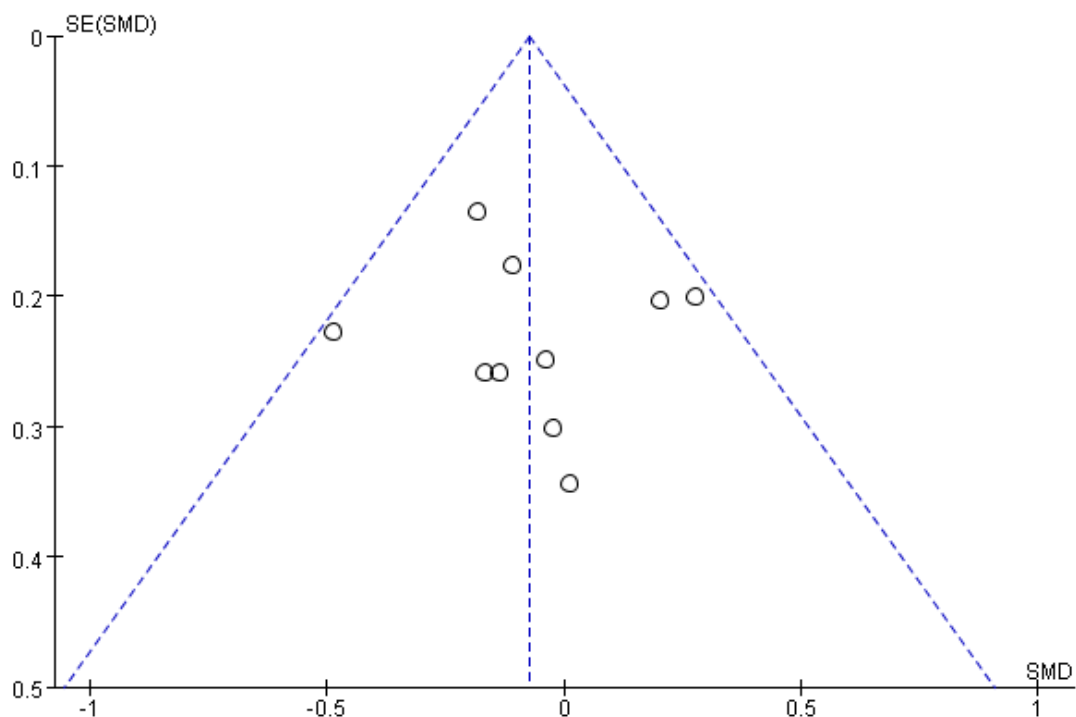

## 2.2 Postoperative SBP

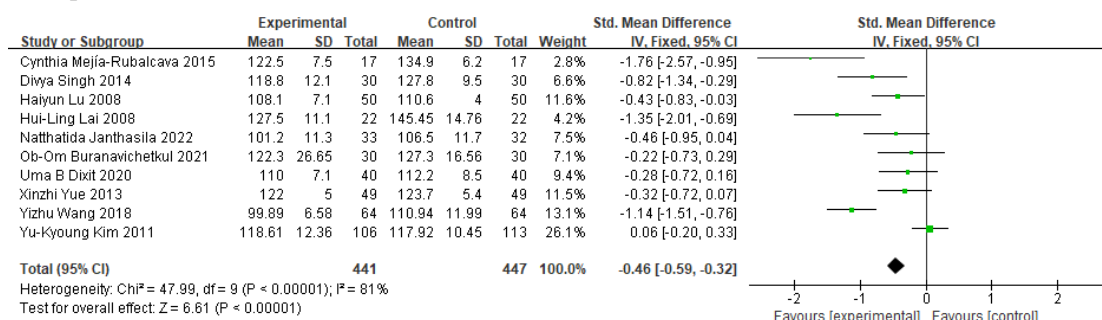

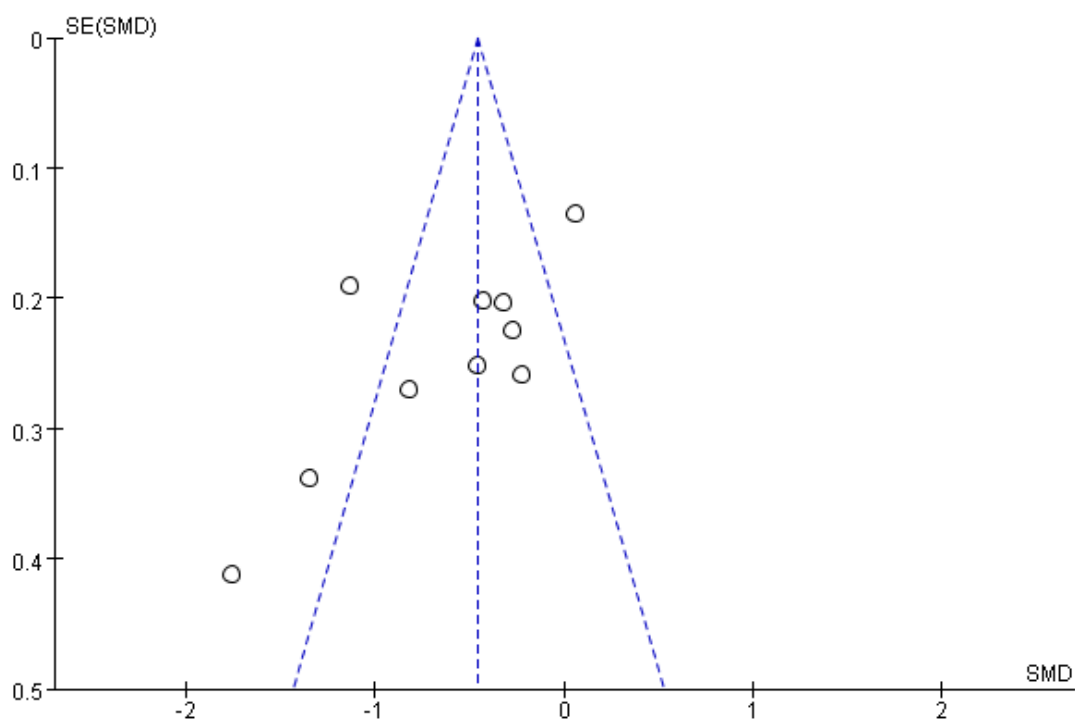

## 2.3 SBP Change

| Study or Subgroup            | Experimental |       |            | Control |       |            | Weight        | Std. Mean Difference        | Std. Mean Difference                                                                 |
|------------------------------|--------------|-------|------------|---------|-------|------------|---------------|-----------------------------|--------------------------------------------------------------------------------------|
|                              | Mean         | SD    | Total      | Mean    | SD    | Total      |               | IV, Fixed, 95% CI           | IV, Fixed, 95% CI                                                                    |
| Cynthia Mejía-Rubalcava 2015 | -9.2         | 8.41  | 17         | 3.3     | 5.57  | 17         | 3.0%          | -1.71 [-2.51, -0.91]        |  |
| Diya Singh 2014              | -3.4         | 5.7   | 30         | 3.8     | 6.7   | 30         | 6.4%          | -1.14 [-1.69, -0.59]        |  |
| Haiyun Lu 2008               | 4.3          | 6.22  | 50         | 8.4     | 5.92  | 50         | 11.9%         | -0.67 [-1.07, -0.27]        |  |
| Hui-Ling Lai 2008            | -8.23        | 11.48 | 22         | 9.45    | 13.88 | 22         | 4.4%          | -1.36 [-2.03, -0.70]        |  |
| Natthasida Janthasila 2022   | -3           | 1.2   | 33         | 1.8     | 1.4   | 32         | 3.0%          | -3.64 [-4.45, -2.83]        |  |
| Ob-Om Buranavichetkul 2021   | 1.37         | 23.08 | 30         | 3.83    | 16.3  | 30         | 7.5%          | -0.12 [-0.63, 0.39]         |  |
| Uma B Dixit 2020             | 1            | 6.62  | 40         | -0.1    | 8.01  | 40         | 10.0%         | 0.15 [-0.29, 0.59]          |  |
| Xinzhai Yue 2013             | 1.3          | 5.27  | 49         | 4.1     | 5.35  | 49         | 11.9%         | -0.52 [-0.93, -0.12]        |  |
| Yizhu Wang 2018              | -5           | 10.1  | 64         | 4.83    | 11.37 | 64         | 14.5%         | -0.91 [-1.27, -0.54]        |  |
| Yu-Kyoung Kim 2011           | -1.88        | 13.55 | 106        | -5.34   | 13.73 | 113        | 27.3%         | 0.25 [-0.01, 0.52]          |  |
| <b>Total (95% CI)</b>        |              |       | <b>441</b> |         |       | <b>447</b> | <b>100.0%</b> | <b>-0.49 [-0.63, -0.35]</b> |  |

Heterogeneity: Chi<sup>2</sup> = 125.41, df = 9 (P < 0.00001); I<sup>2</sup> = 93%  
Test for overall effect: Z = 6.94 (P < 0.00001)



Favours experimental Favours control

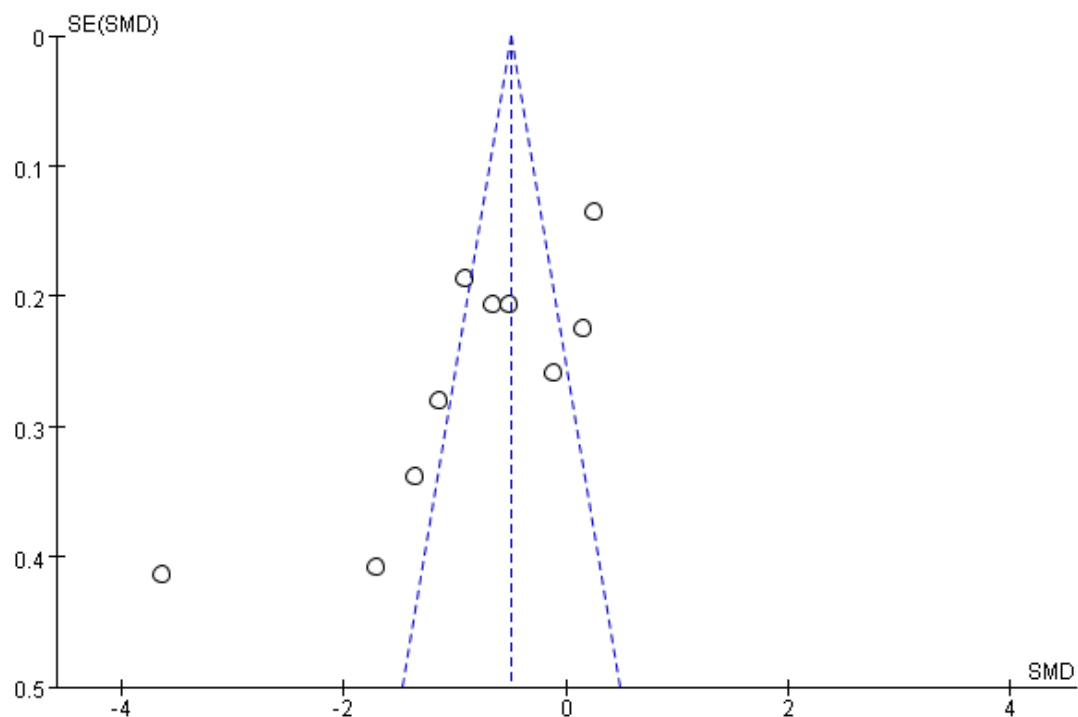

### 3. Diastolic Blood Pressure (DBP)

#### 3.1 Preoperative DBP

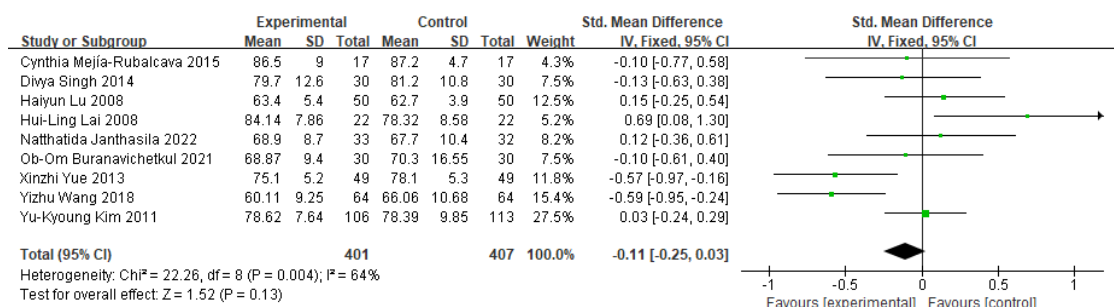

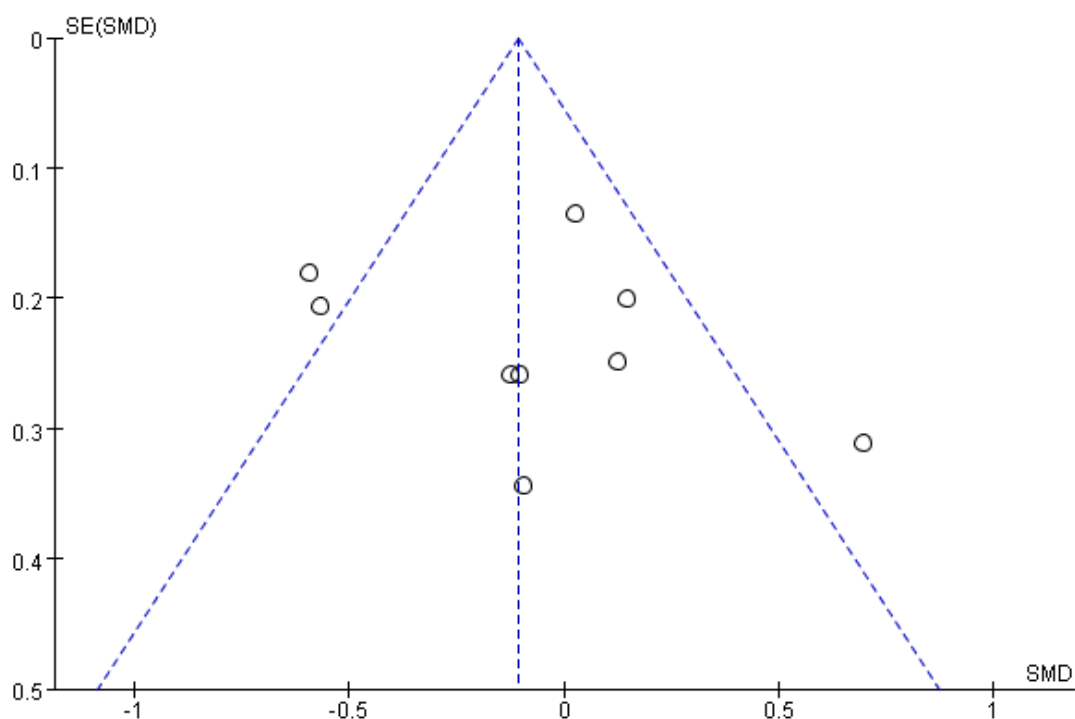

### 3.2 Postoperative DBP

| Study or Subgroup                                                         | Experimental |      |            | Control |       |            | Weight        | Std. Mean Difference<br>IV, Fixed, 95% CI | Std. Mean Difference<br>IV, Fixed, 95% CI |
|---------------------------------------------------------------------------|--------------|------|------------|---------|-------|------------|---------------|-------------------------------------------|-------------------------------------------|
|                                                                           | Mean         | SD   | Total      | Mean    | SD    | Total      |               |                                           |                                           |
| Cynthia Mejia-Rubalcava 2015                                              | 74.9         | 7.5  | 17         | 88.8    | 6.5   | 17         | 2.9%          | -1.93 [-2.77, -1.10]                      |                                           |
| Divya Singh 2014                                                          | 78.2         | 12.5 | 30         | 83.4    | 8     | 30         | 7.6%          | -0.49 [-1.00, 0.03]                       |                                           |
| Haiyun Lu 2008                                                            | 67.4         | 3    | 50         | 70.3    | 3.1   | 50         | 11.8%         | -0.94 [-1.36, -0.53]                      |                                           |
| Hui-Ling Lai 2008                                                         | 84.91        | 9.54 | 22         | 80.5    | 7.71  | 22         | 5.6%          | 0.50 [-0.10, 1.10]                        |                                           |
| Natthatida Janthasila 2022                                                | 67.3         | 7.9  | 33         | 69.2    | 9.8   | 32         | 8.5%          | -0.21 [-0.70, 0.28]                       |                                           |
| Ob-Om Buranavichetkul 2021                                                | 73.57        | 9.94 | 30         | 76.5    | 9.25  | 30         | 7.8%          | -0.30 [-0.81, 0.21]                       |                                           |
| Xinzhi Yue 2013                                                           | 73           | 5    | 49         | 77.3    | 5.2   | 49         | 11.8%         | -0.84 [-1.25, -0.42]                      |                                           |
| Yizhu Wang 2018                                                           | 60.55        | 8.19 | 64         | 70.39   | 15.14 | 64         | 15.5%         | -0.80 [-1.16, -0.44]                      |                                           |
| Yu-Kyoung Kim 2011                                                        | 74.63        | 5.46 | 106        | 77.38   | 11.2  | 113        | 28.4%         | -0.31 [-0.57, -0.04]                      |                                           |
| <b>Total (95% CI)</b>                                                     |              |      | <b>401</b> |         |       | <b>407</b> | <b>100.0%</b> | <b>-0.53 [-0.67, -0.39]</b>               |                                           |
| Heterogeneity: $\chi^2 = 35.48$ , $df = 8$ ( $P < 0.0001$ ); $I^2 = 77\%$ |              |      |            |         |       |            |               |                                           |                                           |
| Test for overall effect: $Z = 7.30$ ( $P < 0.00001$ )                     |              |      |            |         |       |            |               |                                           |                                           |

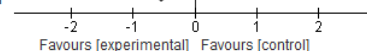

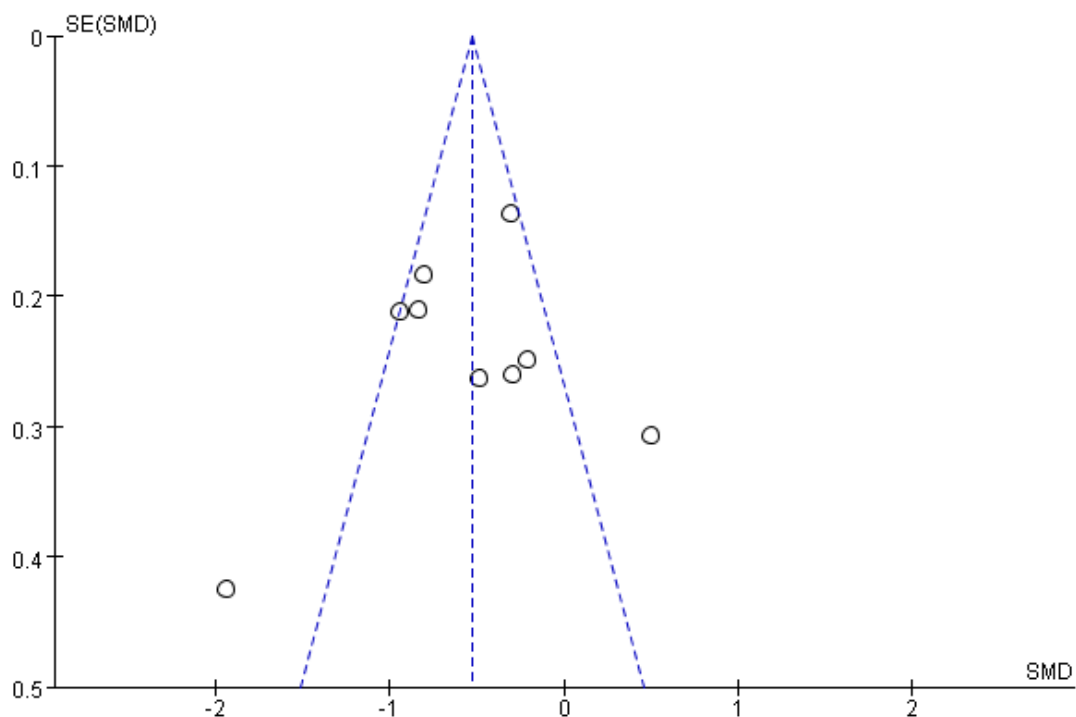

### 3.3 DBP Change

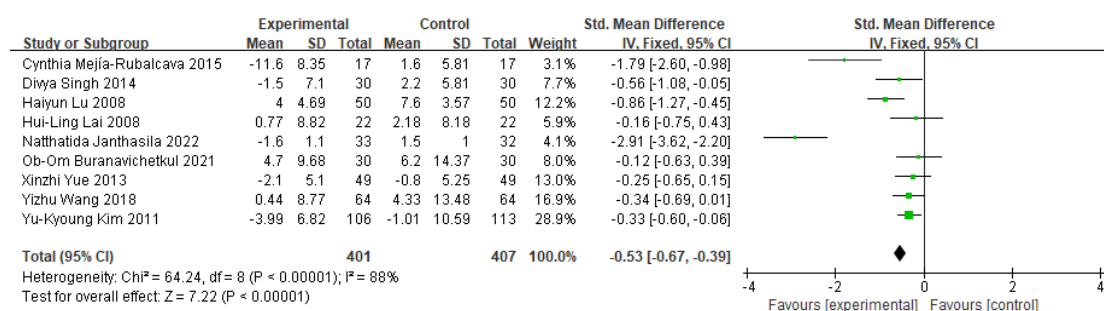

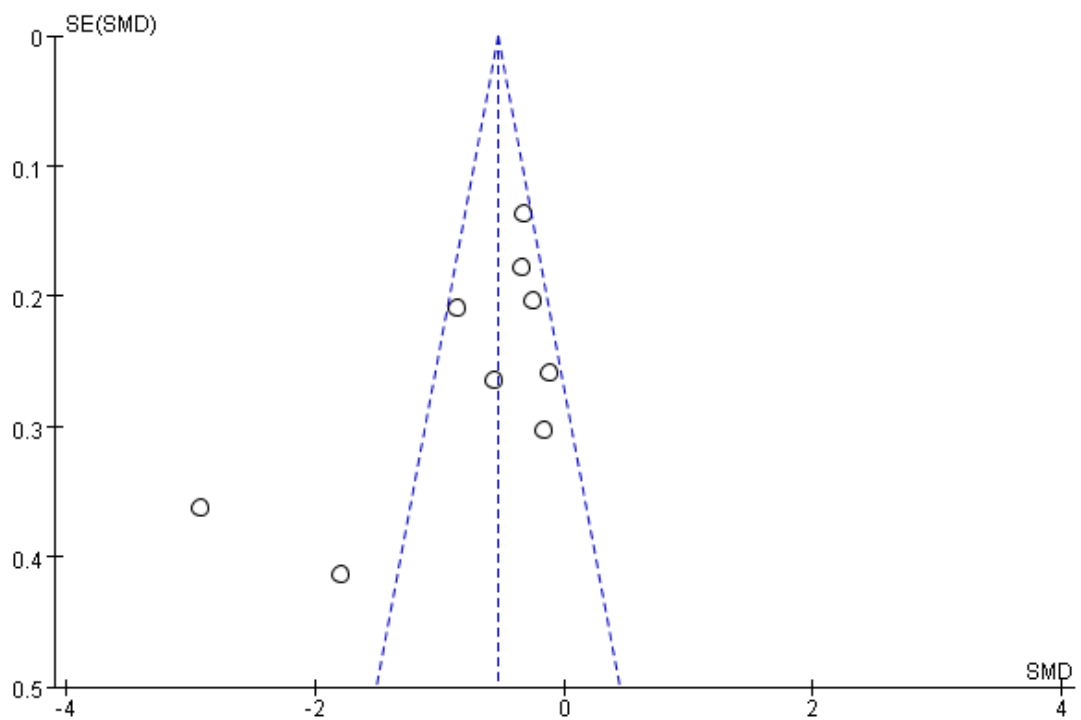

#### 4. Cooperation Rate

##### 4.1 Cooperation Rate Change

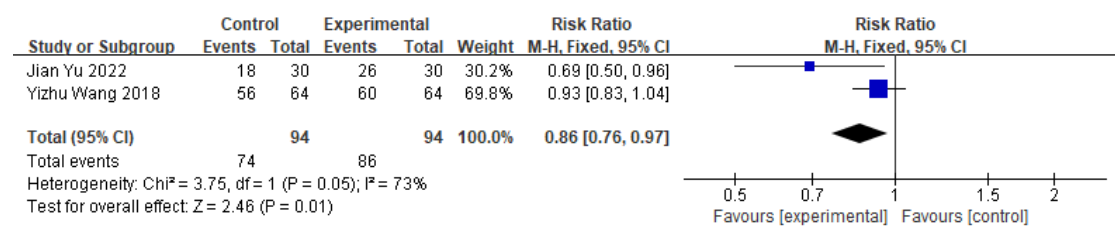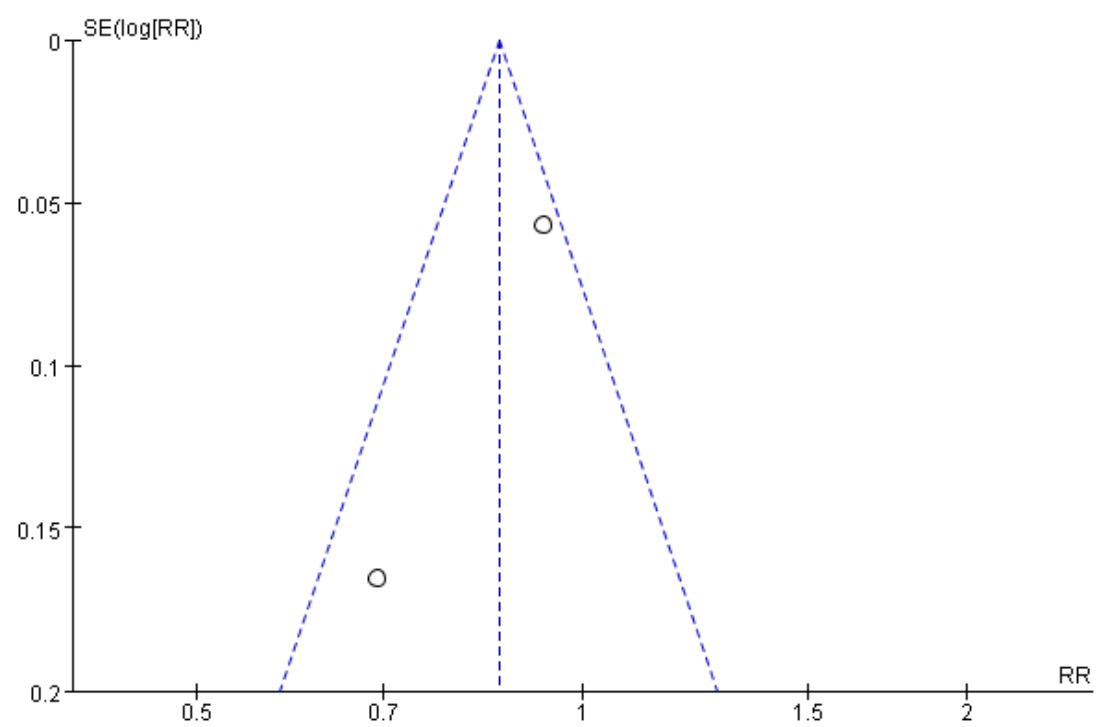

## 5. CFSS-DS

### 5.1 Preoperative CFSS-DS

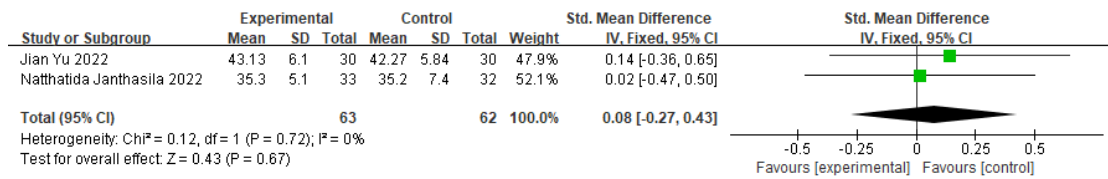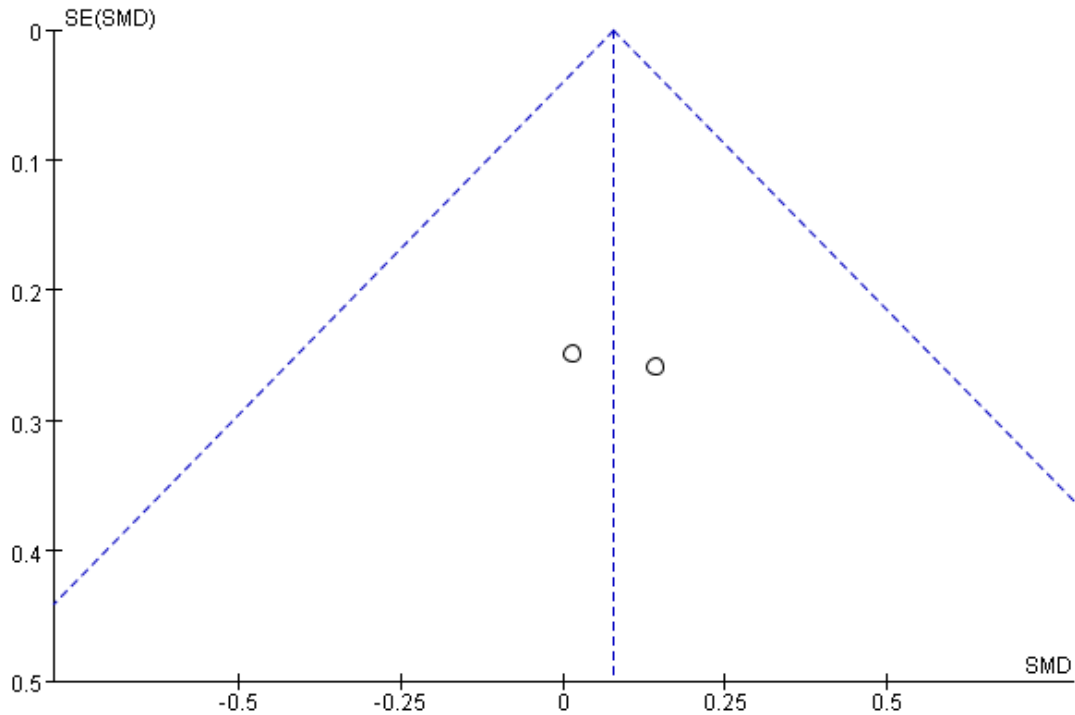

### 5.2 Postoperative CFSS-DS

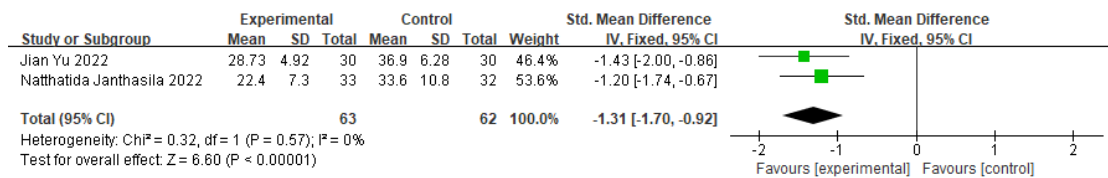



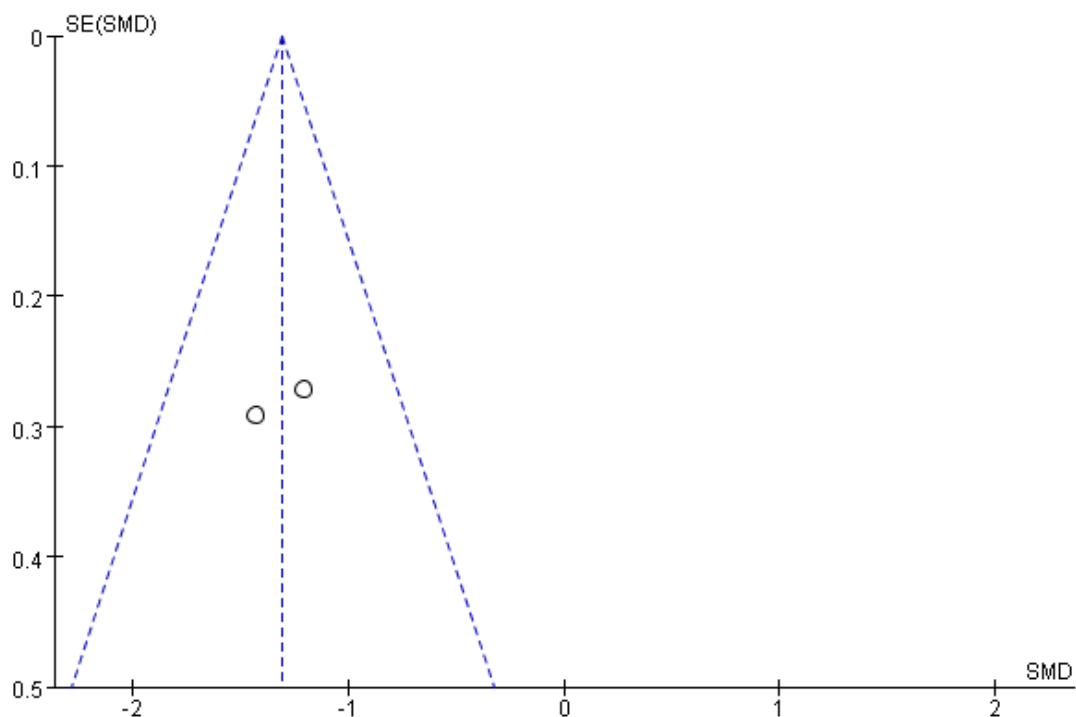

### 5.3 CFSS-DS Change

| Study or Subgroup                                           | Experimental |     |           | Control |      |           | Weight        | Std. Mean Difference        | Std. Mean Difference |
|-------------------------------------------------------------|--------------|-----|-----------|---------|------|-----------|---------------|-----------------------------|----------------------|
|                                                             | Mean         | SD  | Total     | Mean    | SD   | Total     |               | IV, Fixed, 95% CI           |                      |
| Jian Yu 2022                                                | -14.4        | 5.6 | 30        | -5.37   | 6.07 | 30        | 87.7%         | -1.53 [-2.11, -0.95]        |                      |
| Natthatida Janthasila 2022                                  | -12.9        | 1.3 | 33        | -1.6    | 1.4  | 32        | 12.3%         | -8.27 [-9.81, -6.72]        |                      |
| <b>Total (95% CI)</b>                                       |              |     | <b>63</b> |         |      | <b>62</b> | <b>100.0%</b> | <b>-2.36 [-2.90, -1.82]</b> |                      |
| Heterogeneity: Chi² = 64.14, df = 1 (P < 0.00001); I² = 98% |              |     |           |         |      |           |               |                             |                      |
| Test for overall effect: Z = 8.52 (P < 0.00001)             |              |     |           |         |      |           |               |                             |                      |

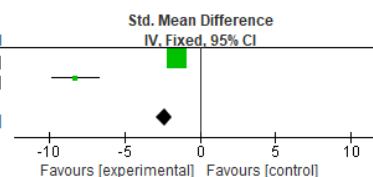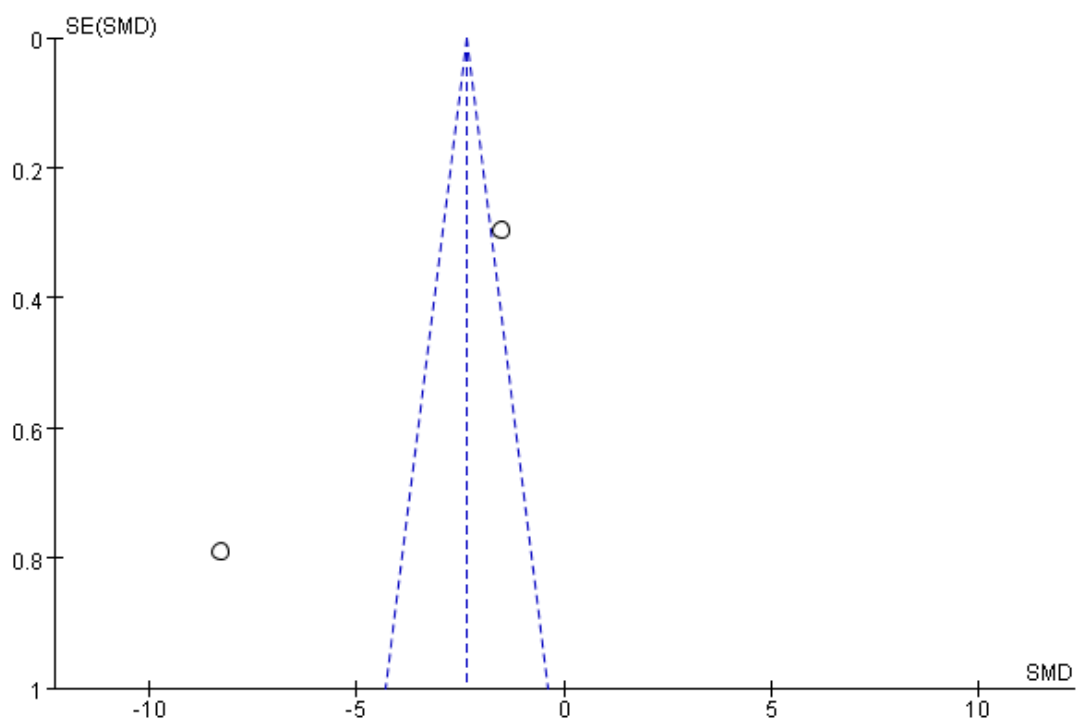

## 6. MDAS

### 6.1 Preoperative MDAS

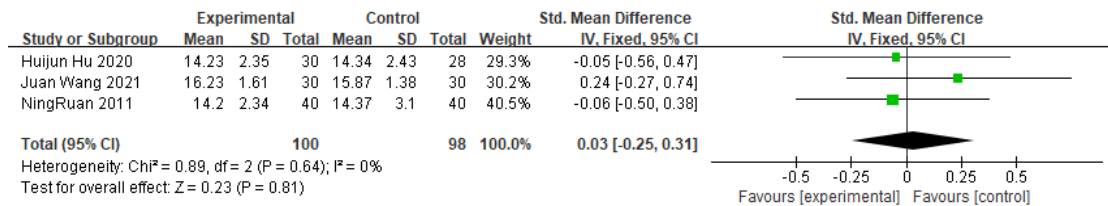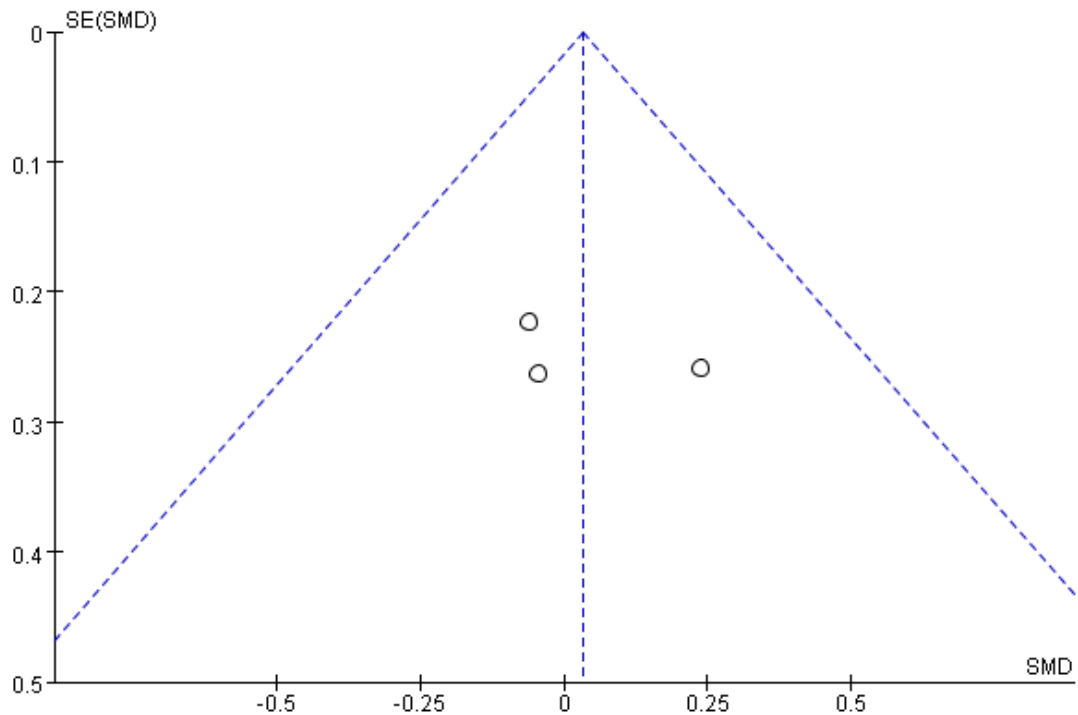

## 6.2 Postoperative MDAS

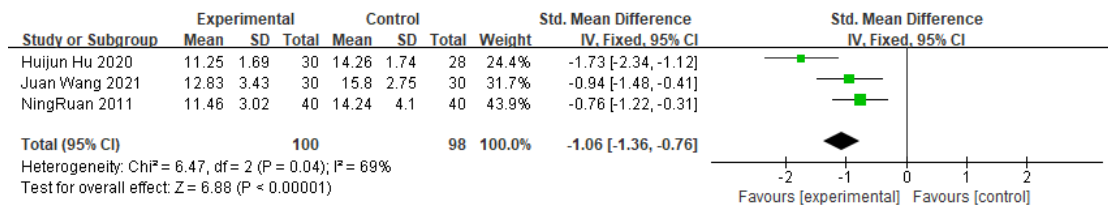

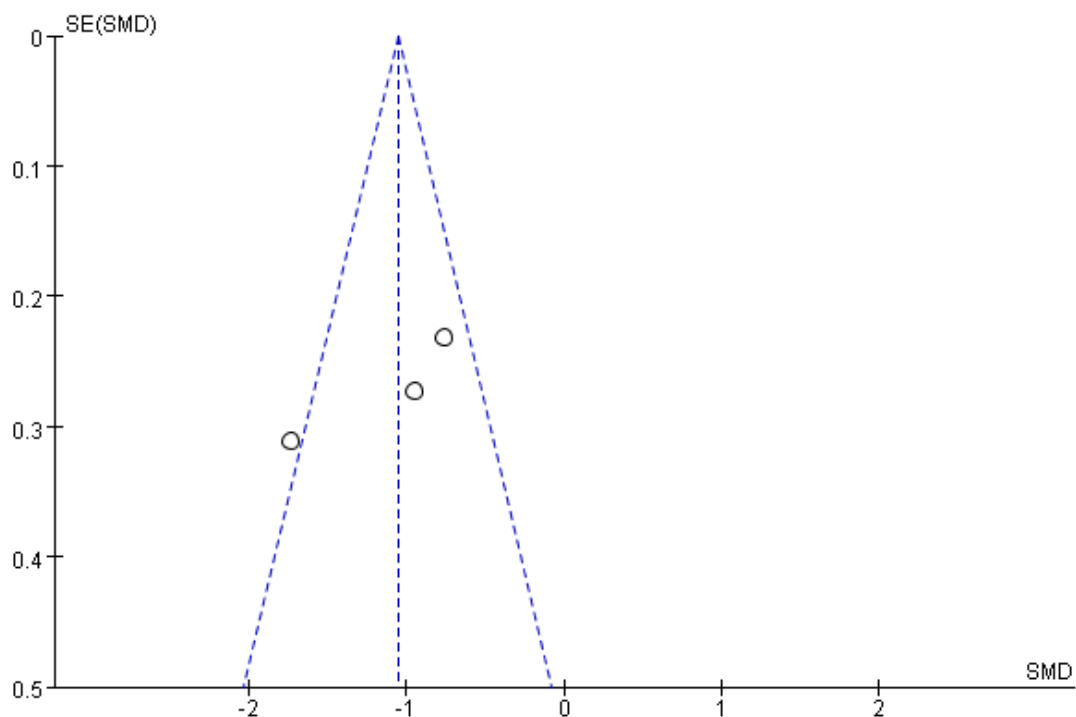

### 6.3 MDAS Change

| Study or Subgroup                                       | Experimental |      |            | Control |      |           | Weight        | Std. Mean Difference        | Std. Mean Difference |
|---------------------------------------------------------|--------------|------|------------|---------|------|-----------|---------------|-----------------------------|----------------------|
|                                                         | Mean         | SD   | Total      | Mean    | SD   | Total     |               | IV, Fixed, 95% CI           | IV, Fixed, 95% CI    |
| Huijun Hu 2020                                          | -2.98        | 2.1  | 30         | -0.08   | 2.17 | 28        | 27.1%         | -1.34 [-1.91, -0.77]        |                      |
| Juan Wang 2021                                          | -3.4         | 3.42 | 30         | -0.07   | 2.43 | 30        | 29.9%         | -1.11 [-1.65, -0.56]        |                      |
| NingRuan 2011                                           | -2.74        | 2.74 | 40         | -0.13   | 3.7  | 40        | 42.9%         | -0.79 [-1.25, -0.34]        |                      |
| <b>Total (95% CI)</b>                                   |              |      | <b>100</b> |         |      | <b>98</b> | <b>100.0%</b> | <b>-1.04 [-1.34, -0.74]</b> |                      |
| Heterogeneity: Chi² = 2.23, df = 2 (P = 0.33); I² = 10% |              |      |            |         |      |           |               |                             |                      |
| Test for overall effect: Z = 6.80 (P < 0.00001)         |              |      |            |         |      |           |               |                             |                      |

Favours [experimental] Favours [control]

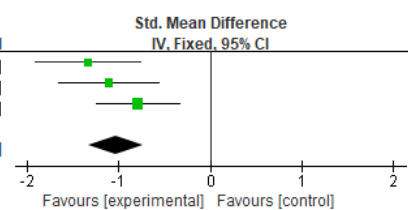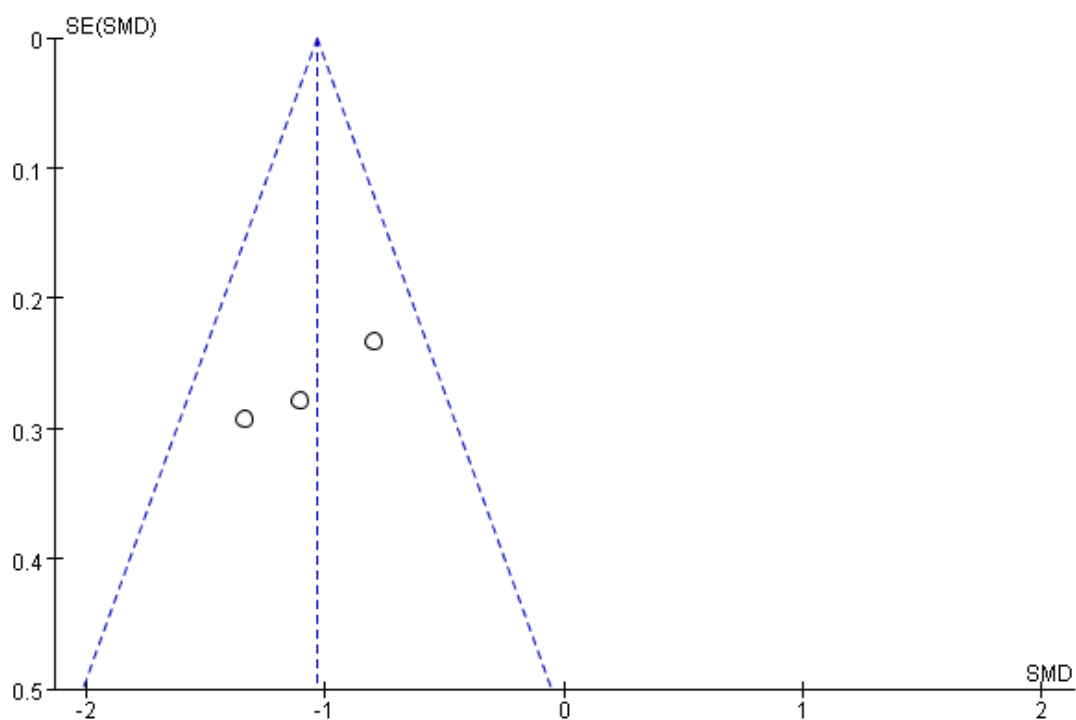

### 7. DAS

## 7.1 Preoperative DAS

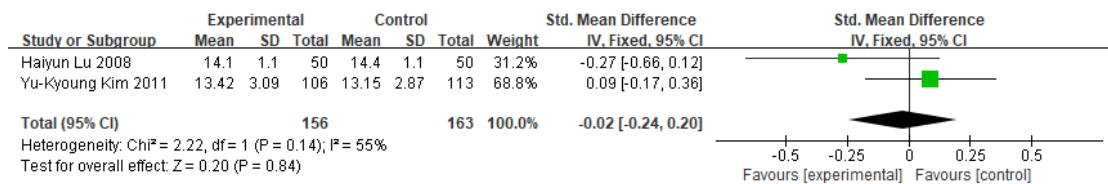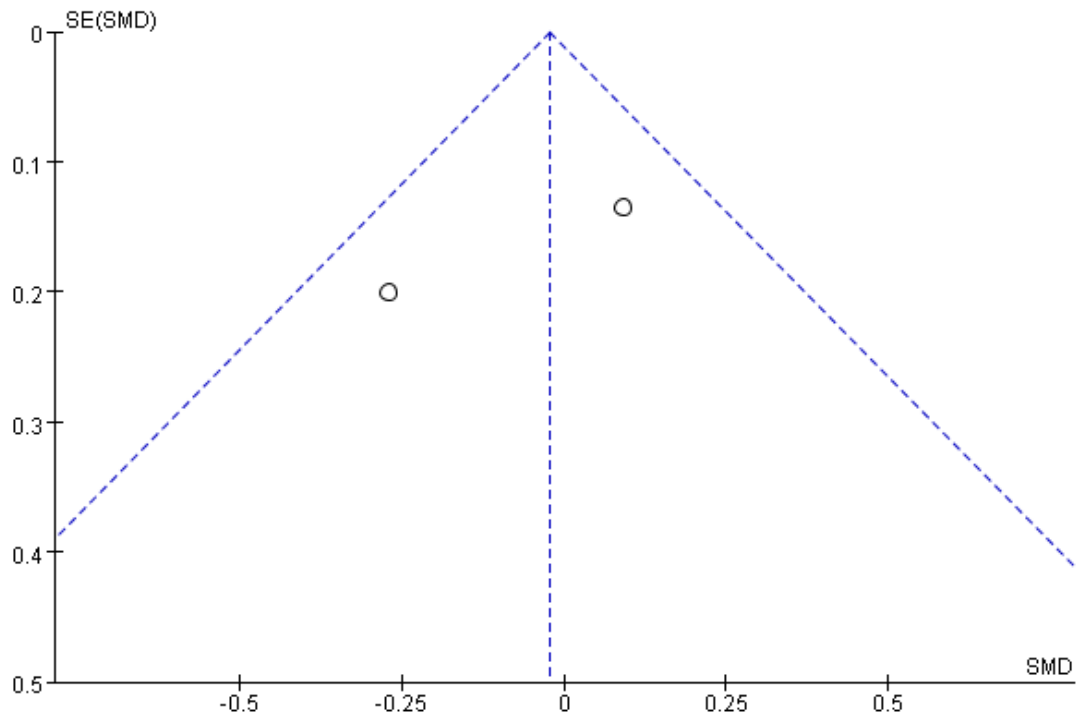

## 7.2 Postoperative DAS

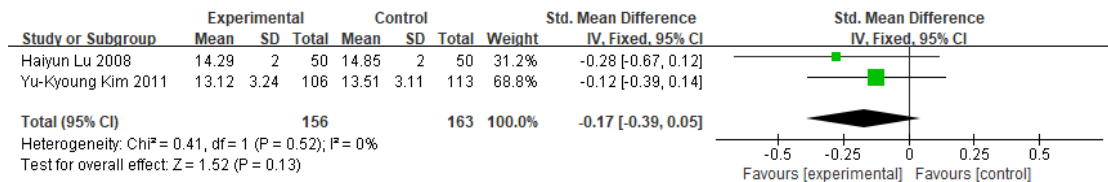

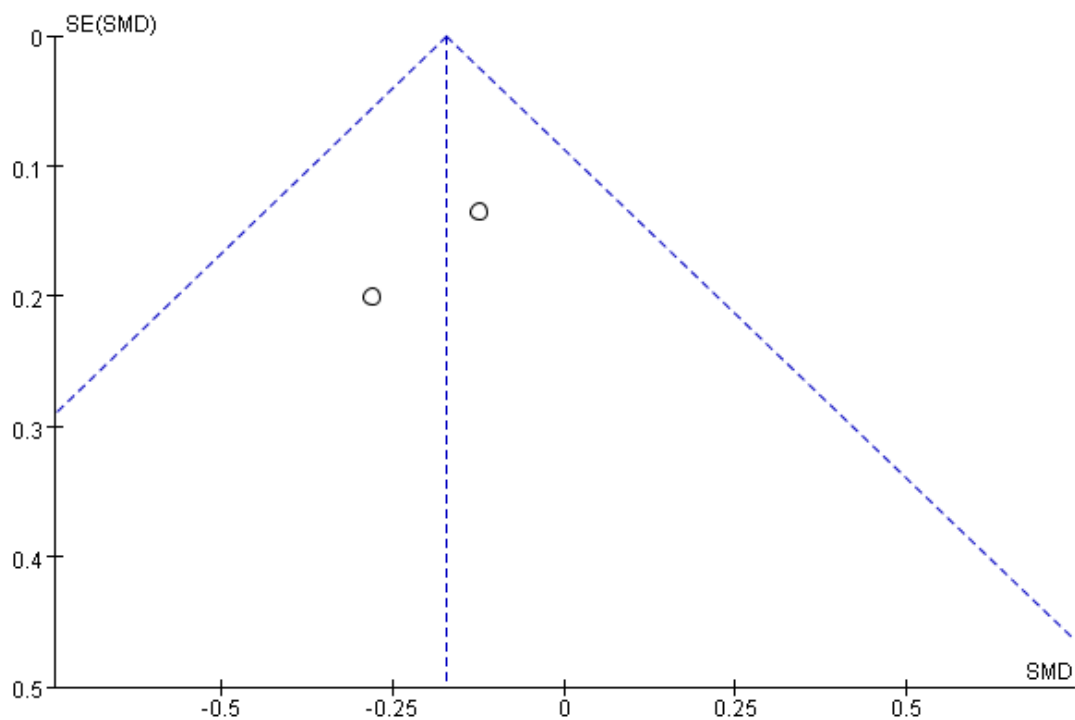

### 7.3 DAS Change

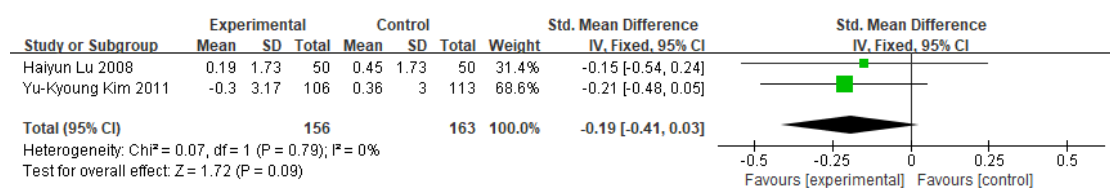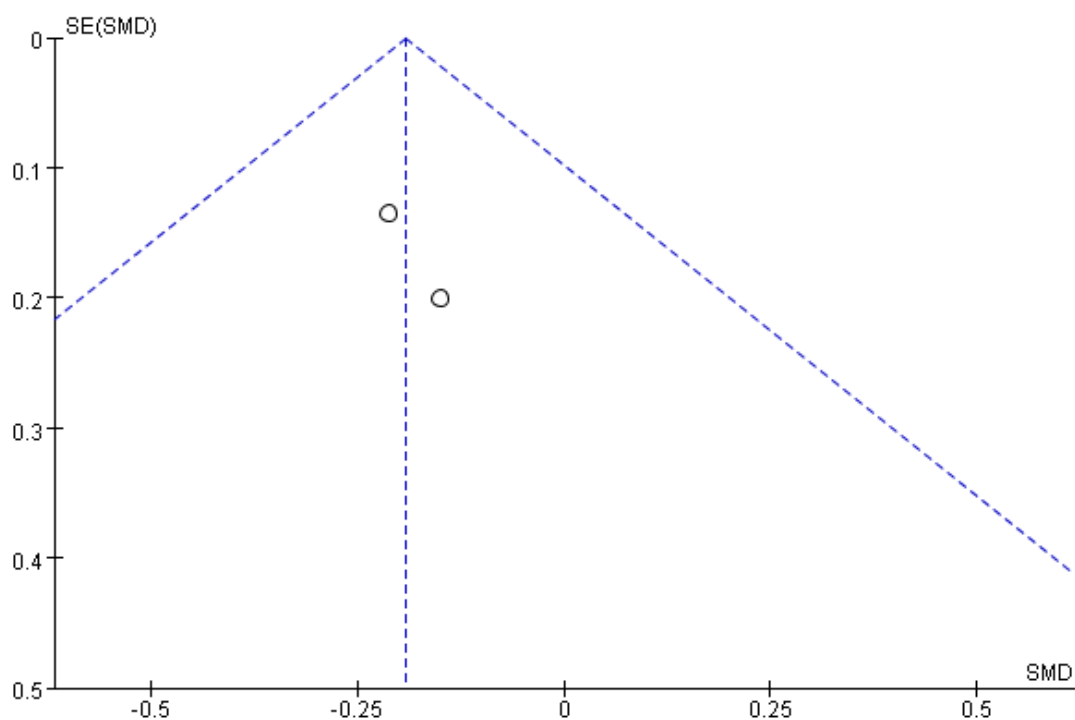

## 8. S-AI

### 8.1 Preoperative S-AI

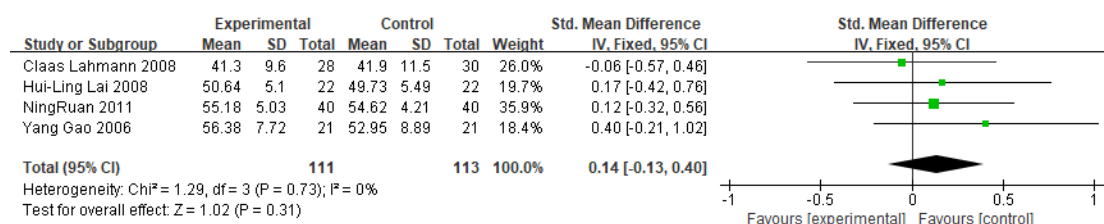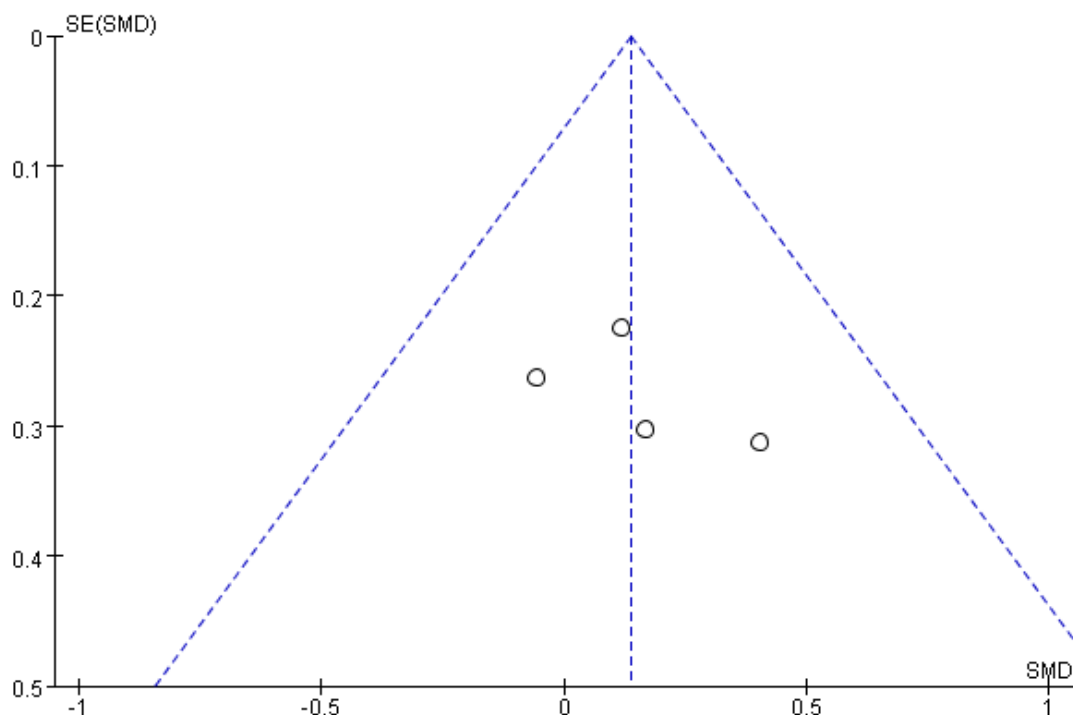

## 8.2 Postoperative S-AI

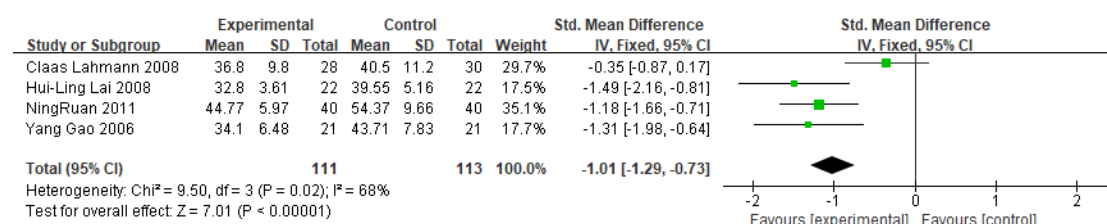

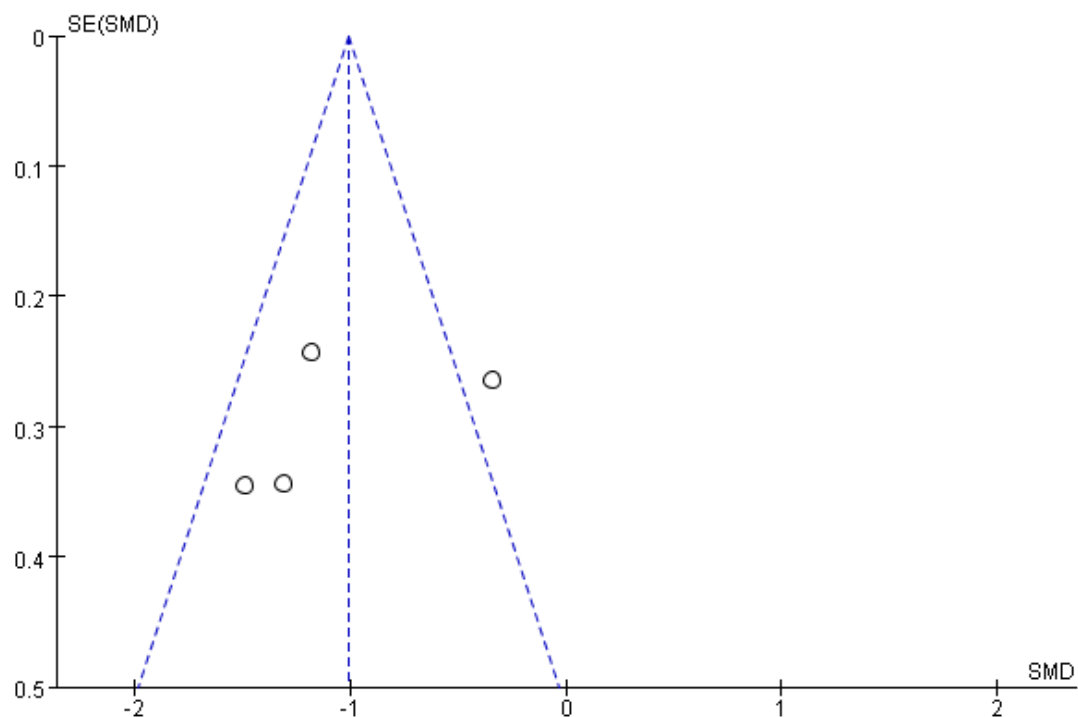

### 8.3 S-AI Change

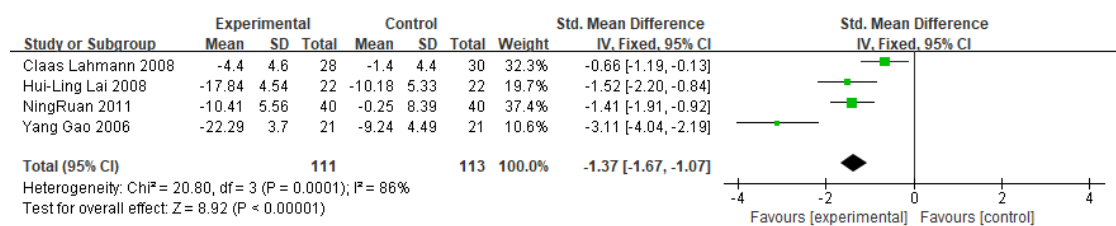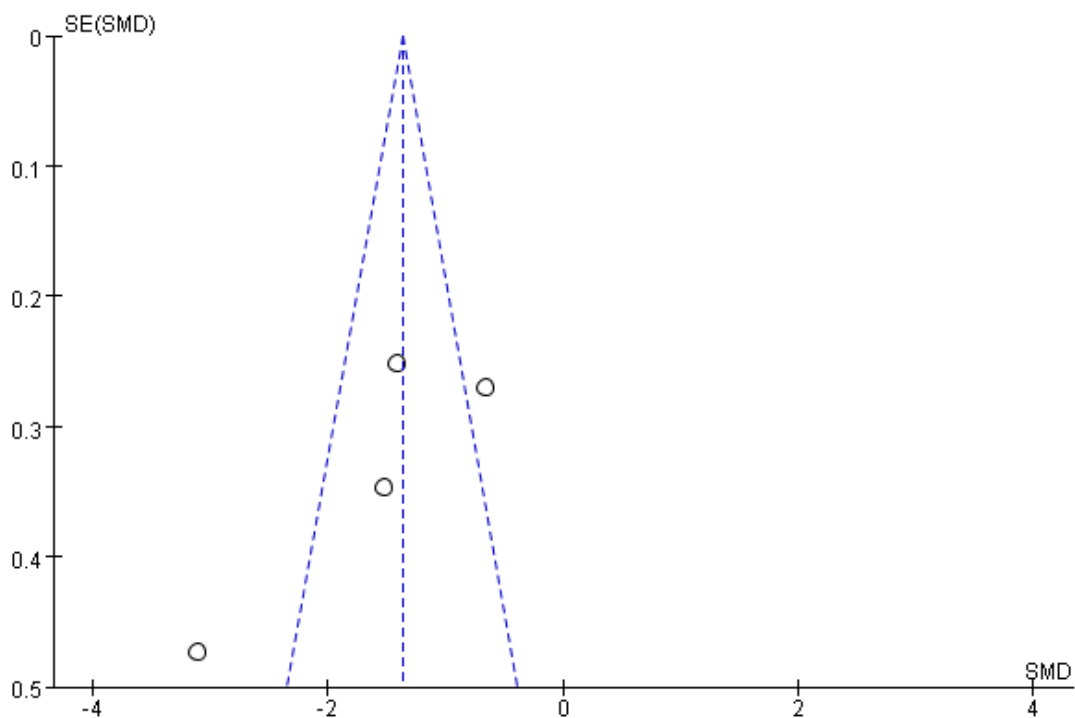

### 9. VPT

## 9.1 Preoperative VPT

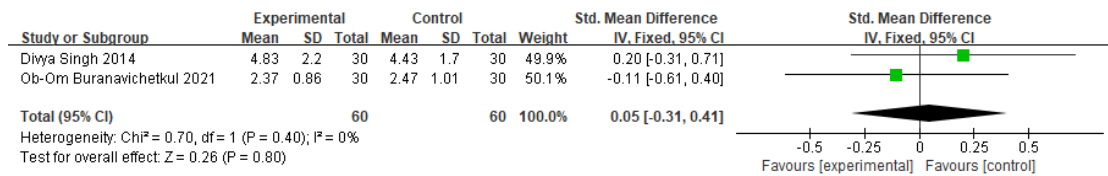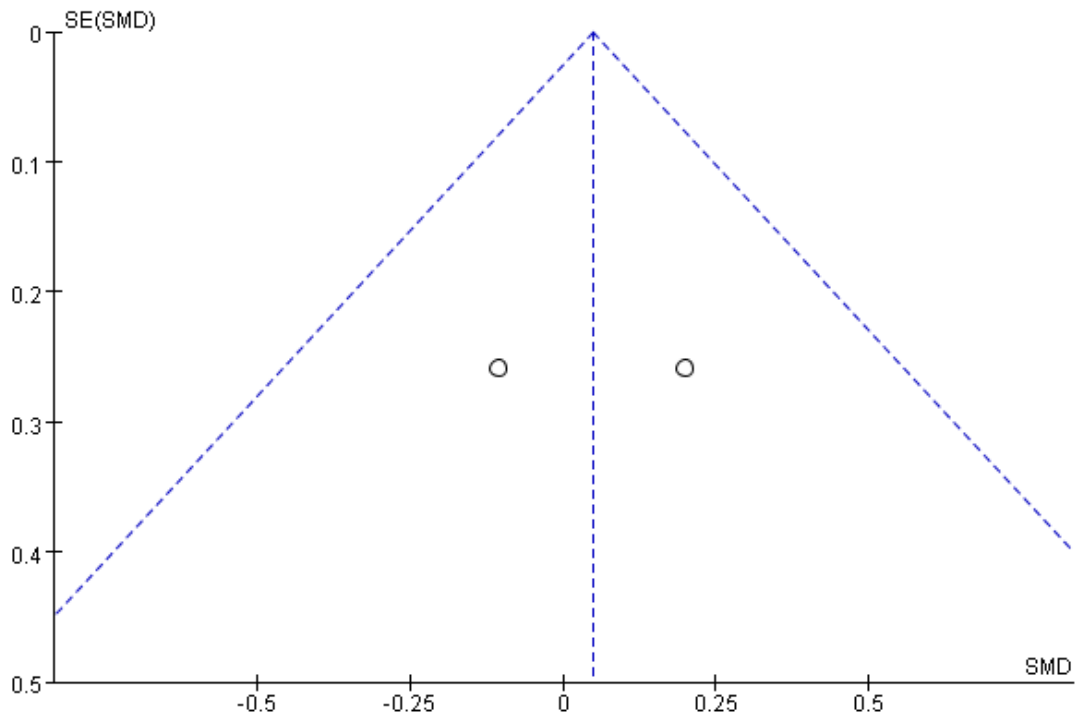

## 9.2 Postoperative VPT

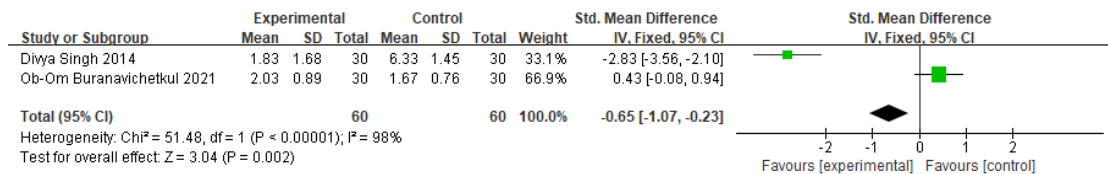



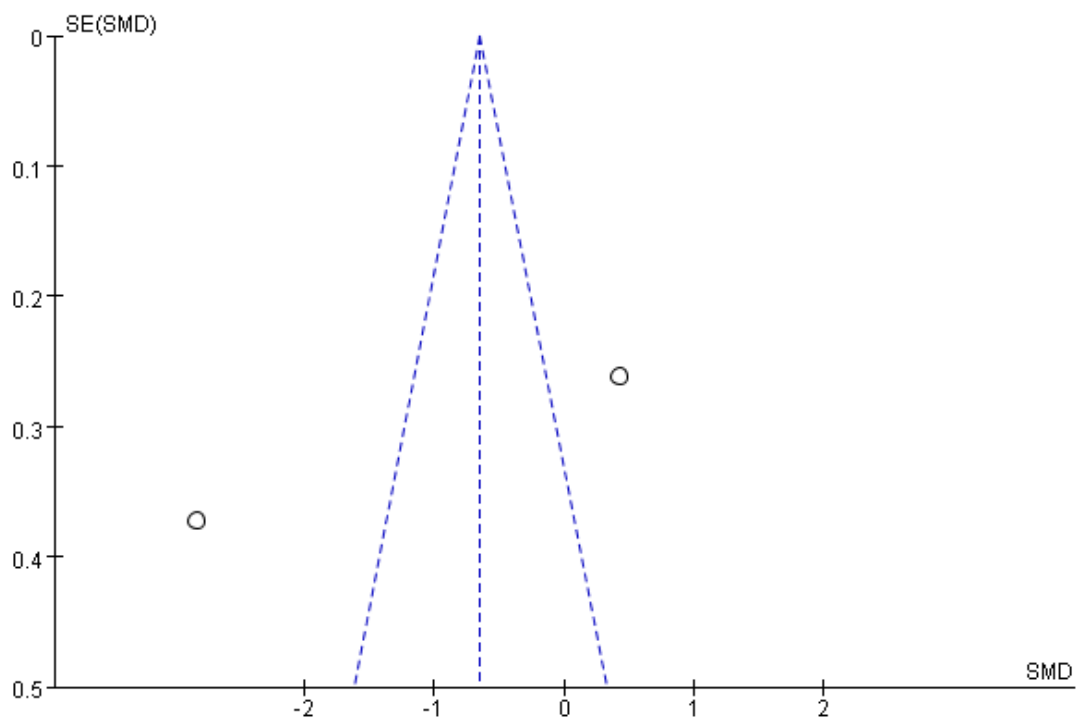

### 9.3 VPT Change

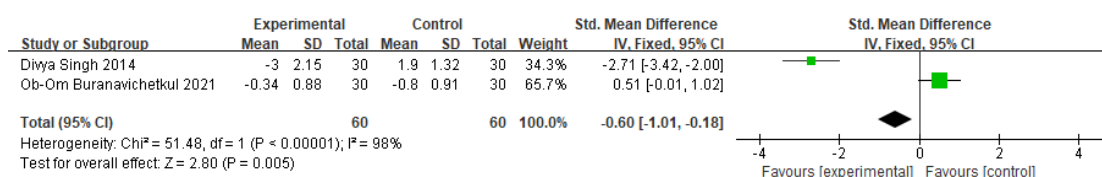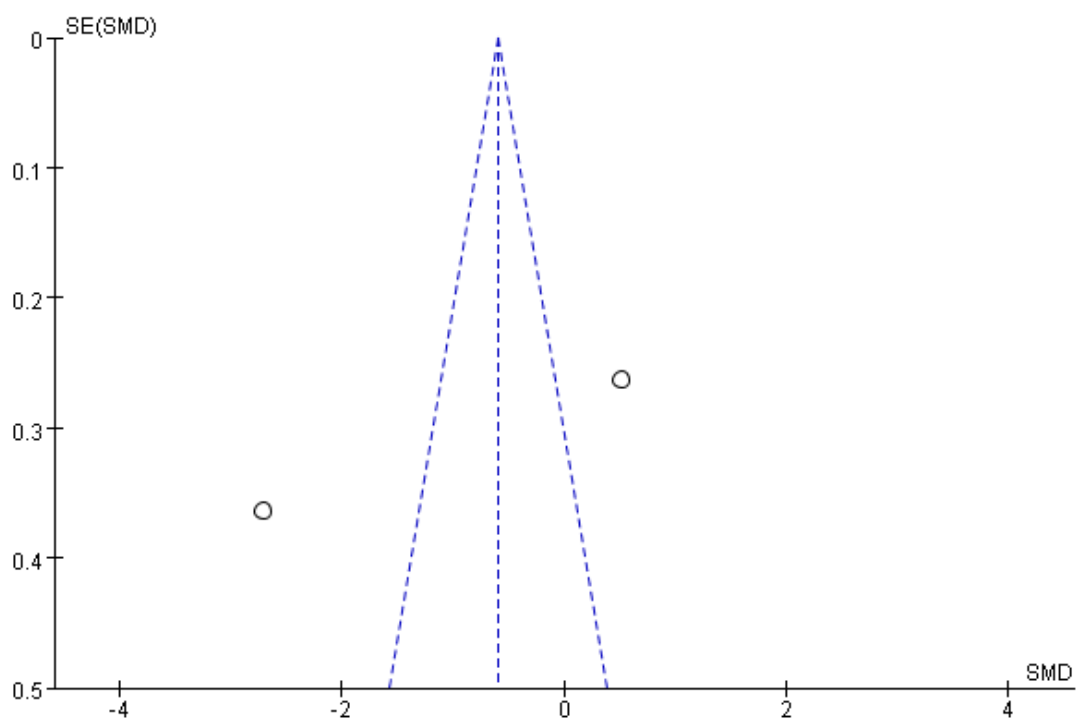

## 10. Pain Score

### 10.1 Preoperative Pain Score

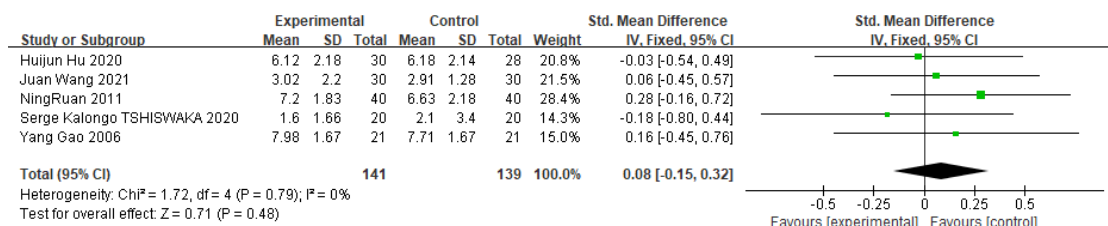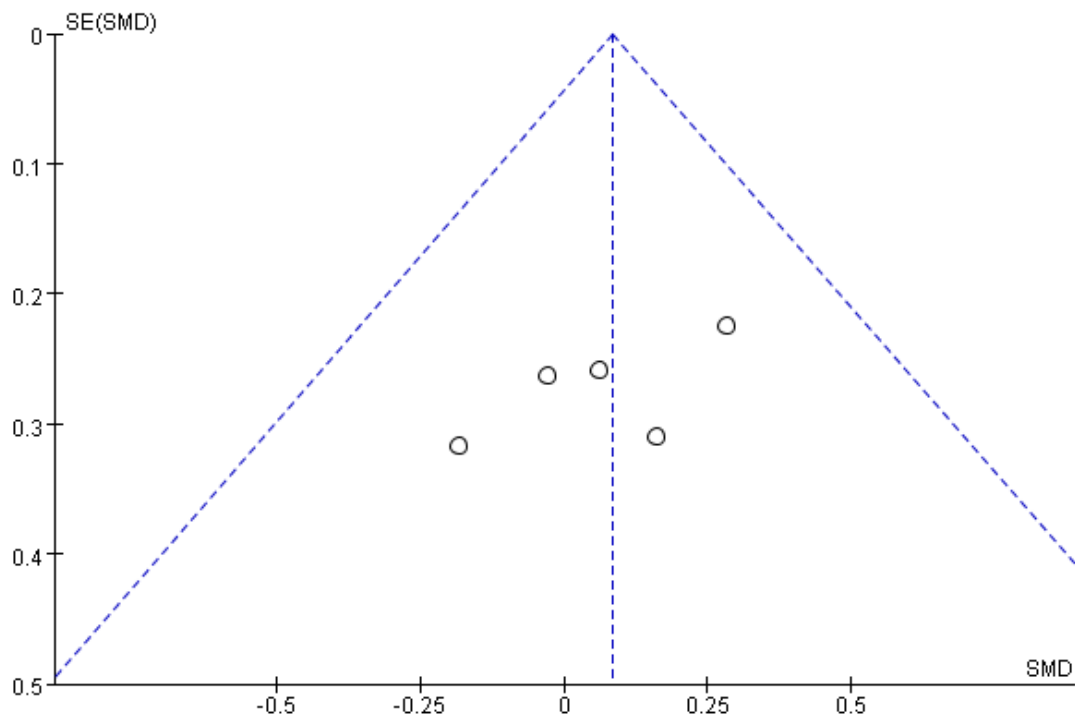

## 10.2 Postoperative Pain Score

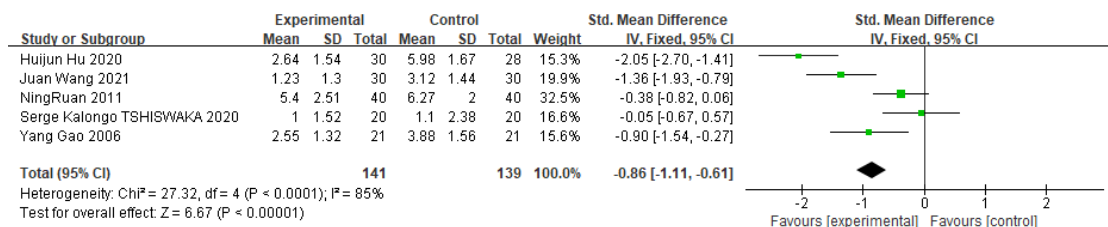

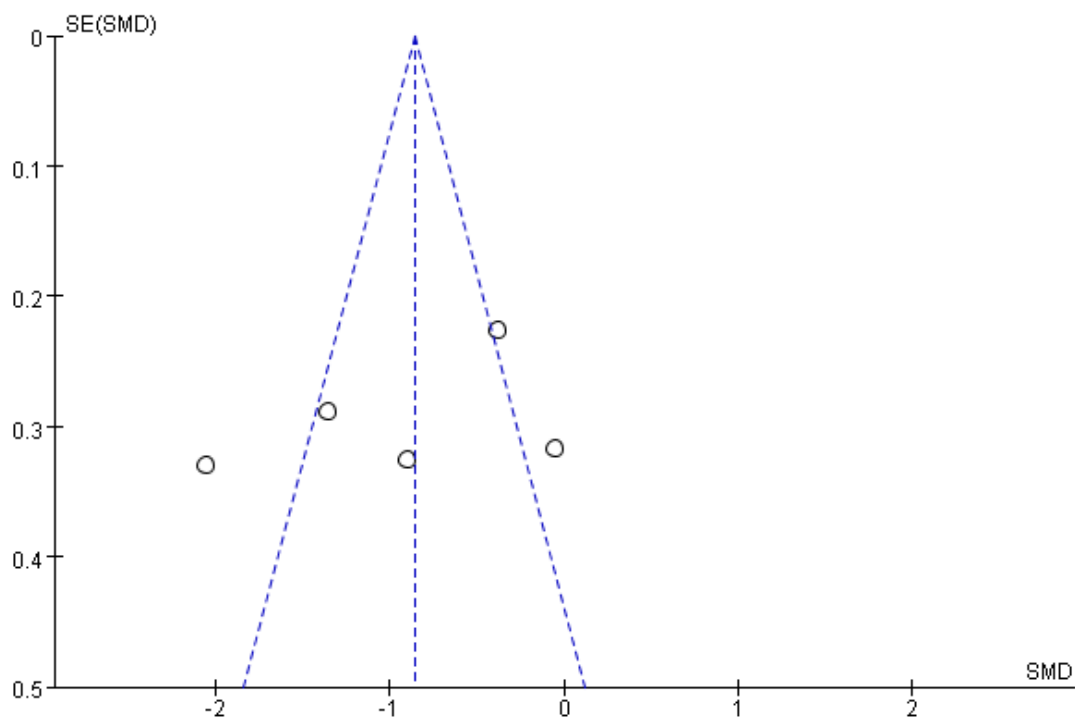

### 10.3 Pain Score Change

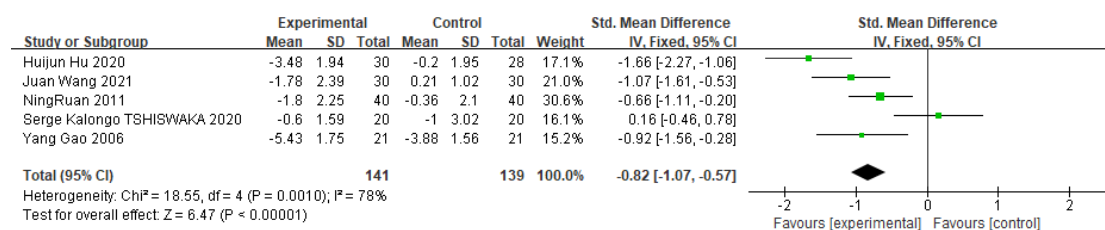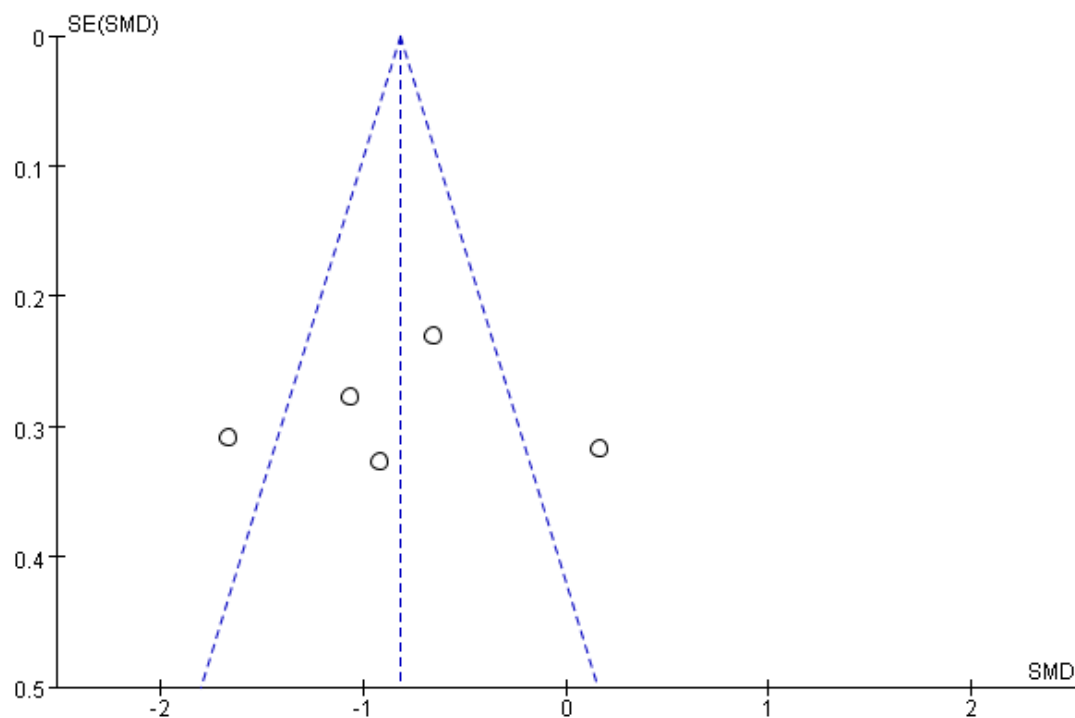

## Subject-based subgroup analysis (adults and children)

### 1. Heart Rate

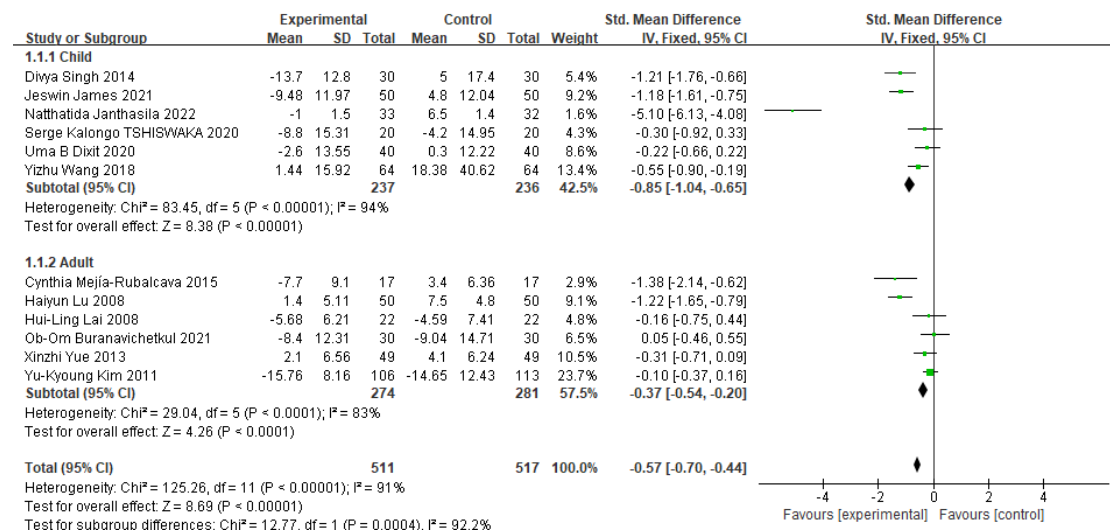

### 2. Systolic Blood Pressure

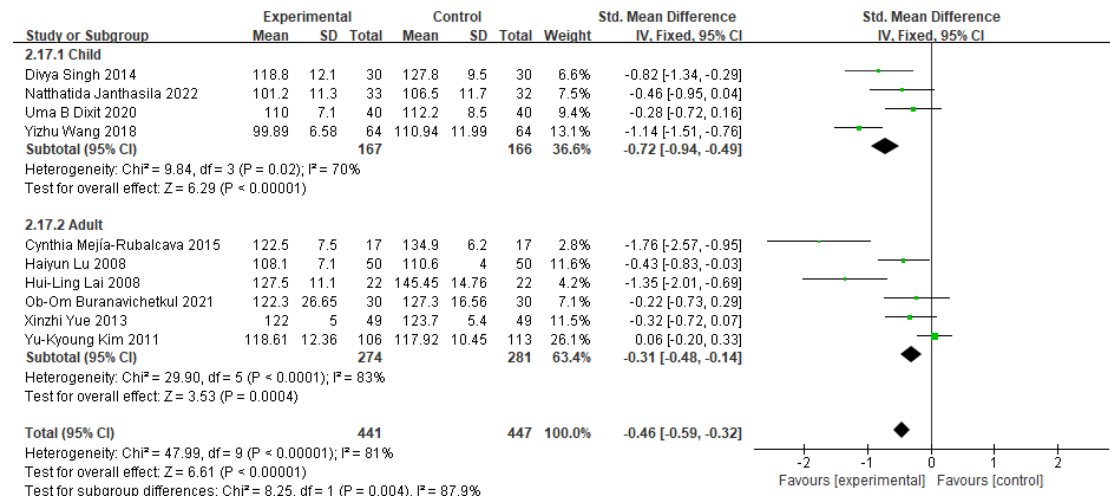

### 3. Diastolic Blood Pressure

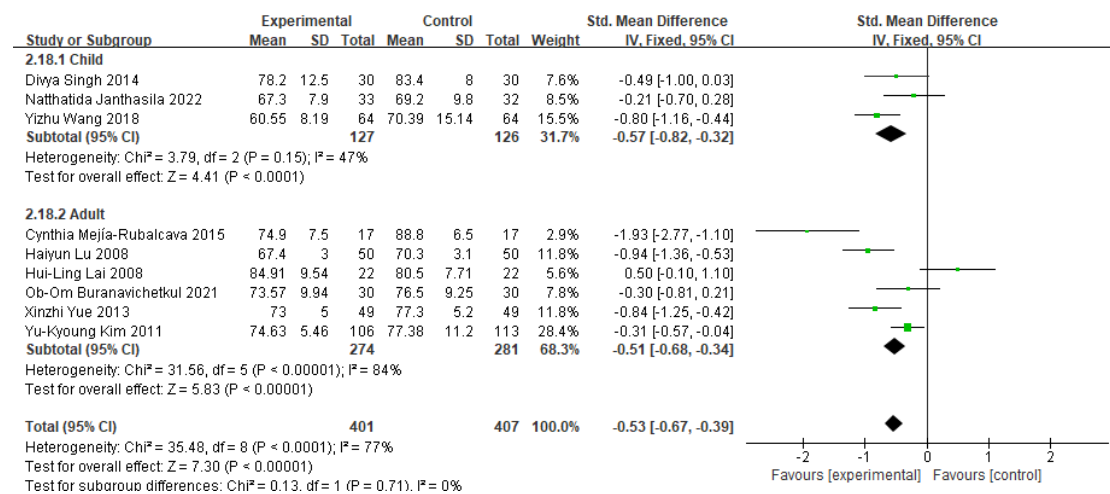

Supplement: s1 [file s1]
