# Supplementary material for: Efficacy of Music Intervention for Dental Anxiety Disorders: A Systematic Review and Meta-Analysis
Source: MDPI journal article supplement (doi:10.3390/medicina59020209), 2023-01-20
Supplement: s1 [file s1]

|    |                              |   |    |    |    |             |             |              |              |            |              |              |           |              |              |         |             |           |            |    |    |    |    |    |    |    |    |    |    |    |    |
|----|------------------------------|---|----|----|----|-------------|-------------|--------------|--------------|------------|--------------|--------------|-----------|--------------|--------------|---------|-------------|-----------|------------|----|----|----|----|----|----|----|----|----|----|----|----|
|    |                              | C | 22 | 7  | 15 | NA          | -4.96±7.41  | 81.64±7.47   | 76.82±7.36   | 9.45±13.88 | 136.06±1278  | 145.45±1476  | 2.15±8.18 | 78.32 ± 8.36 | 80.59 ± 7.71 |         | -10.18±5.23 | 4973±6.49 | 39.55±5.16 |    | NA | NA | NA |    | NA | NA | NA |    | NA | NA | NA |
| 14 | Northside Institute 2022     | T | 31 | 13 | 20 | 11.00±0.80  | -1.6±1.5    | 83.6±0.8     | 82.6±.99     | -5.0±1.2   | 198.2±12.9   | 186.2±31.3   | -16±1.3   | 69.9 ± 8.7   | 87.3±7.9     | 4798-06 | -12.8±1.3   | 352 ± 5.1 | 224±7.3    | NA |
|    |                              | C | 32 | 19 | 13 | 11.00±0.80  | 6.5±1.4     | 85.0 ±5.2    | 85.5±.91     | 1.8±1.4    | 198.7±13.0   | 186.5±11.7   | 1.5±1.0   | 67.5±0.8     | 182±5.8      |         | -1.8±1.4    | 352 ± 7.4 | 13±1.0.8   |    | NA | NA | NA |    | NA | NA | NA |    | NA | NA | NA |
| 15 | Vasa 91 Data 2020            | T | 40 | 22 | 18 | 5.27 ± 8.11 | -2.6±1.35   | 185.5±13.6   | 182.9±15.5   | 1±0.62     | 109.6        | 110±.71      | NA        | NA           | NA           | NA      | NA          | NA        | NA         | NA | NA | NA | NA | NA | NA | NA | NA | NA | NA | NA | NA |
|    |                              | C | 40 | 26 | 14 | 5.25 ± 8.12 | 9.3±12.22   | 198 ±22.6    | 198.3±15.8   | -0.1±0.01  | 112.3±7.4    | 112.2±8.5    | NA        | NA           | NA           |         | NA          | NA        | NA         |    | NA | NA | NA |    | NA | NA | NA |    | NA | NA | NA |
| 16 | Jerric James                 | T | 50 | NA | NA | NA          | -9.40±10.97 | 185.5±15.18  | 91.02 ± 10.2 | NA         | NA           | NA           | NA        | NA           | NA           | NA      | NA          | NA        | NA         | NA | NA | NA | NA | NA | NA | NA | NA | NA | NA | NA | NA |
|    |                              | C | 50 | NA | NA | NA          | 8.8±12.04   | 99.4 ± 12.78 | 185.2±15.2   | NA         | NA           | NA           | NA        | NA           | NA           |         | NA          | NA        | NA         |    | NA | NA | NA |    | NA | NA | NA |    | NA | NA | NA |
| 17 | Serge Kalinge YIMB09/NA 2021 | T | 30 | 14 | 6  | NA          | -8.6±15.31  | 93.86±4.85   | 85.86±15.75  | NA         | NA           | NA           | NA        | NA           | NA           | VAB     | -0.6±1.59   | 1.40±1.06 | 1.06±1.02  | NA |
|    |                              | C | 30 | 8  | 11 | NA          | -0.2±14.95  | 91.35±44.36  | 87.15±15.48  | NA         | NA           | NA           | NA        | NA           | NA           |         | -1±1.02     | 2.35±1.40 | 1.36±1.38  |    | NA | NA | NA |    | NA | NA | NA |    | NA | NA | NA |
| 18 | Oh-Gin-Bumuncheolal 2021     | T | 30 | 17 | 13 | 48.03±14.02 | -8.4±12.31  | 76.66±12.45  | 68.26±12.17  | 1.75±20.88 | 120.95±13.81 | 122.36±26.65 | 4.7±9.68  | 63.87±8.68   | 71.27±9.94   | VPT     | -0.74±6.48  | 2.27±8.06 | 2.05±8.89  | NA |
|    |                              | C | 30 | 20 | 10 | 52.53±12.18 | -0.66±8.75  | 77.57±11.85  | 68.55±18.43  | 3.83±16.58 | 123.47±16.65 | 127.36±16.56 | 6.2±14.37 | 76.36±8.55   | 76.96±8.25   |         | -0.8±6.91   | 2.47±1.01 | 1.67±8.76  |    | NA | NA | NA |    | NA | NA | NA |    | NA | NA | NA |
