# Supplementary material for: Efficacy of Music Intervention for Dental Anxiety Disorders: A Systematic Review and Meta-Analysis
Source: MDPI journal article supplement (doi:10.3390/medicina59020209), 2023-01-20
Supplement: s1 [file s1]

**Supplementary file S1: Keywords and search result**

| Database or website                    | Strategy of searching                                                              | Latest retrieval time | Number of records |
|----------------------------------------|------------------------------------------------------------------------------------|-----------------------|-------------------|
| <b>Wan fang</b>                        | (oral OR dental) AND music                                                         | 24 October, 2022      | 269               |
| <b>CNKI</b>                            | (oral + dental) * music in Subject                                                 | 24 October, 2022      | 346               |
| <b>VIP</b>                             | Abstract = (oral OR dental) AND Abstract = music                                   | 24 October, 2022      | 184               |
| <b>PubMed</b>                          | (oral OR dental) AND music in All Filed                                            | 24 October, 2022      | 980               |
| <b>Web of Science</b>                  | ((TS=oral) OR TS=(dental)) AND TS=(music)                                          | 24 October, 2022      | 1101              |
| <b>Science Direct</b>                  | (oral OR dental) AND music in Title, abstract, keywords                            | 24 October, 2022      | 104               |
| <b>Cochrane Library</b>                | (oral OR dental) AND music in Title Abstract Keyword                               | 24 October, 2022      | 202               |
| <b>Clinical tral.gov</b>               | music   (oral OR dental)                                                           | 24 October, 2022      | 28                |
| <b>Chinese Clinical Trial Registry</b> | Music in Title                                                                     | 24 October, 2022      | 92                |
| <b>Scopus</b>                          | ( TITLE-ABS-KEY ( oral ) OR TITLE-ABS-KEY ( dental ) AND TITLE-ABS-KEY ( music ) ) | 23 December, 2022     | 1656              |
| <b>CINAHL</b>                          | AB oral OR AB dental AND AB music AND randomized controlled trials                 | 23 December, 2022     | 126415            |
| <b>References of included studies</b>  | None                                                                               | 29 October, 2022      | 0                 |

*Note.* CNKI: China National Knowledge Infrastructure; VIP: China Science and Technology Journal Database.
