# Supplementary material for: Efficacy of Music Intervention for Dental Anxiety Disorders: A Systematic Review and Meta-Analysis
Source: MDPI journal article supplement (doi:10.3390/medicina59020209), 2023-01-20
Supplement: s1 [file s1]

# Postoperative Heart Rate

**tab year, gen(dummy\_year)**

| Year  | Freq. | Percent | Cum.   |
|-------|-------|---------|--------|
| 2008  | 2     | 16.67   | 16.67  |
| 2011  | 1     | 8.33    | 25.00  |
| 2013  | 1     | 8.33    | 33.33  |
| 2014  | 1     | 8.33    | 41.67  |
| 2015  | 1     | 8.33    | 50.00  |
| 2018  | 1     | 8.33    | 58.33  |
| 2020  | 2     | 16.67   | 75.00  |
| 2021  | 2     | 16.67   | 91.67  |
| 2022  | 1     | 8.33    | 100.00 |
| Total | 12    | 100.00  |        |

```
. metareg _ES dummy_year1 dummy_year2 dummy_year3 dummy_year4 dummy_year5 dummy_year6 dummy_year7 dummy_year8 dummy_year9, wsse(_ES) b
> sest(reml)
Iteration 1: tau^2 = 0
```

```
Meta-analysis regression                                No of studies = 12
                                                         tau^2 method    reml
                                                         tau^2 estimate = 0
```

Successive values of tau^2 differ by less than 10^-4 :convergence achieved

|             | Coefficient | Std. err. | z     | P> z  | [95% conf. interval] |          |
|-------------|-------------|-----------|-------|-------|----------------------|----------|
| dummy_year1 | 11.37501    | 17.23279  | 0.66  | 0.509 | -22.40063            | 45.15066 |
| dummy_year2 | 13.3        | 17.16071  | 0.78  | 0.438 | -20.33438            | 46.93439 |
| dummy_year3 | 13.7        | 17.08362  | 0.80  | 0.423 | -19.78329            | 47.18328 |
| dummy_year4 | -3.5        | 26.35015  | -0.13 | 0.894 | -55.14534            | 48.14534 |
| dummy_year5 | (dropped)   |           |       |       |                      |          |
| dummy_year6 | 12.41       | 17.36411  | 0.71  | 0.475 | -21.62302            | 46.44303 |
| dummy_year7 | 14.2053     | 16.91834  | 0.84  | 0.401 | -18.95403            | 47.36463 |
| dummy_year8 | 16.46131    | 16.80324  | 0.98  | 0.327 | -16.47244            | 49.39506 |
| dummy_year9 | 7.900002    | 19.01184  | 0.42  | 0.678 | -29.36252            | 45.16253 |
| _cons       | -16.8       | 16.8      | -1.00 | 0.317 | -49.72741            | 16.1274  |

. tab country, gen(dummy\_country)

| Country  | Freq. | Percent | Cum.   |
|----------|-------|---------|--------|
| Brazil   | 1     | 8.33    | 8.33   |
| China    | 4     | 33.33   | 41.67  |
| India    | 3     | 25.00   | 66.67  |
| Korea    | 1     | 8.33    | 75.00  |
| Mexico   | 1     | 8.33    | 83.33  |
| Thailand | 2     | 16.67   | 100.00 |
| Total    | 12    | 100.00  |        |

```
. metareg _ES dummy_country1 dummy_country2 dummy_country3 dummy_country4 dummy_country5 dummy_country6, wsse(_ES) bsest(reml)
Iteration 1: tau^2 = 0

Meta-analysis regression                                No of studies =    12
                                                         tau^2 method    reml
                                                         tau^2 estimate =     0

Successive values of tau^2 differ by less than 10^-4 :convergence achieved
```

|              | Coefficient | Std. err. | z     | P> z  | [95% conf. interval] |          |
|--------------|-------------|-----------|-------|-------|----------------------|----------|
| dummy_coun~1 | 5.133512    | 5.256586  | 0.98  | 0.329 | -5.169207            | 15.43623 |
| dummy_coun~2 | 3.179273    | 5.241818  | 0.61  | 0.544 | -7.094502            | 13.45305 |
| dummy_coun~3 | (dropped)   |           |       |       |                      |          |
| dummy_coun~4 | 3.783514    | 5.937945  | 0.64  | 0.524 | -7.854645            | 15.42167 |
| dummy_coun~5 | -9.516489   | 17.47139  | -0.54 | 0.586 | -43.75978            | 24.7268  |
| dummy_coun~6 | 6.941746    | 4.808112  | 1.44  | 0.149 | -2.481981            | 16.36547 |
| _cons        | -7.283514   | 4.79679   | -1.52 | 0.129 | -16.68505            | 2.118021 |

. tab adult, gen(dummy\_adult)

| Adult    | Freq. | Percent | Cum.   |
|----------|-------|---------|--------|
| Adult    | 5     | 41.67   | 41.67  |
| Children | 6     | 50.00   | 91.67  |
| Unknown  | 1     | 8.33    | 100.00 |
| Total    | 12    | 100.00  |        |

```
. metareg _ES dummy_adult1 dummy_adult2 dummy_adult3, wsse(_ES) bsest(reml)
Iteration 1: tau^2 = 0
```

Meta-analysis regression

No of studies = 12  
tau^2 method reml  
tau^2 estimate = 0

Successive values of tau^2 differ by less than 10^-4 :convergence achieved

|              | Coefficient | Std. err. | z     | P> z  | [95% conf. interval] |          |
|--------------|-------------|-----------|-------|-------|----------------------|----------|
| dummy_adult1 | 5.186743    | 5.609481  | 0.92  | 0.355 | -5.807638            | 16.18112 |
| dummy_adult2 | 2.140886    | 5.868857  | 0.36  | 0.715 | -9.361862            | 13.64363 |
| dummy_adult3 | (dropped)   |           |       |       |                      |          |
| _cons        | -5.599998   | 5.599998  | -1.00 | 0.317 | -16.57579            | 5.375797 |

```
. tab operation, gen(dummy_operation)
```

| Operation              | Freq. | Percent | Cum.   |
|------------------------|-------|---------|--------|
| Oral Therapy           | 3     | 25.00   | 25.00  |
| Pediatric Oral Therapy | 5     | 41.67   | 66.67  |
| Periodontal surgery    | 1     | 8.33    | 75.00  |
| Root canal therapy     | 1     | 8.33    | 83.33  |
| Tooth extraction       | 2     | 16.67   | 100.00 |
| Total                  | 12    | 100.00  |        |

```
. metareg _ES dummy_operation1 dummy_operation2 dummy_operation3 dummy_operation4 dummy_operation5, wsse(_ES) bsest(reml)
Iteration 1: tau^2 = 0
```

Meta-analysis regression

No of studies = 12  
tau^2 method reml  
tau^2 estimate = 0

Successive values of tau^2 differ by less than 10^-4 :convergence achieved

|              | Coefficient | Std. err. | z     | P> z  | [95% conf. interval] |          |
|--------------|-------------|-----------|-------|-------|----------------------|----------|
| dummy_oper~1 | 1.250494    | 5.911168  | 0.21  | 0.832 | -10.33518            | 12.83617 |
| dummy_oper~2 | 1.937848    | 5.556943  | 0.35  | 0.727 | -8.953559            | 12.82925 |
| dummy_oper~3 | 4.939995    | 5.280319  | 0.94  | 0.350 | -5.40924             | 15.28923 |
| dummy_oper~4 | (dropped)   |           |       |       |                      |          |
| dummy_oper~5 | 1.285008    | 6.298351  | 0.20  | 0.838 | -11.05953            | 13.62955 |
| _cons        | -5.269997   | 5.269997  | -1.00 | 0.317 | -15.599              | 5.059007 |

## Postoperative Systolic Blood Pressure

. tab year, gen(dummy\_year)

| Year  | Freq. | Percent | Cum.   |
|-------|-------|---------|--------|
| 2008  | 2     | 20.00   | 20.00  |
| 2011  | 1     | 10.00   | 30.00  |
| 2013  | 1     | 10.00   | 40.00  |
| 2014  | 1     | 10.00   | 50.00  |
| 2015  | 1     | 10.00   | 60.00  |
| 2018  | 1     | 10.00   | 70.00  |
| 2020  | 1     | 10.00   | 80.00  |
| 2021  | 1     | 10.00   | 90.00  |
| 2022  | 1     | 10.00   | 100.00 |
| Total | 10    | 100.00  |        |

```
. metareg _ES dummy_year1 dummy_year2 dummy_year3 dummy_year4 dummy_year5 dummy_year6 dummy_year7 dummy_year8 dummy_year9, wsse(_ES) b
> sest(reml)
Iteration 1: tau^2 = 0
```

```
Meta-analysis regression          No of studies = 10
                                tau^2 method    reml
                                tau^2 estimate = 0
```

Successive values of tau^2 differ by less than 10^-4 :convergence achieved

|             | Coefficient | Std. err. | z     | P> z  | [95% conf. interval] |
|-------------|-------------|-----------|-------|-------|----------------------|
| dummy_year1 | 8.256011    | 11.32403  | 0.73  | 0.466 | -13.93868 30.4507    |
| dummy_year2 | 11.74001    | 11.07153  | 1.06  | 0.289 | -9.959786 33.4398    |
| dummy_year3 | 9.350006    | 11.18001  | 0.84  | 0.403 | -12.56241 31.26242   |
| dummy_year4 | 2.050003    | 14.25141  | 0.14  | 0.886 | -25.88224 29.98225   |
| dummy_year5 | -1.349991   | 16.60911  | -0.08 | 0.935 | -33.90324 31.20326   |
| dummy_year6 | (dropped)   |           |       |       |                      |
| dummy_year7 | 8.850006    | 11.26688  | 0.79  | 0.432 | -13.23267 30.93268   |
| dummy_year8 | 6.050003    | 12.12858  | 0.50  | 0.618 | -17.72159 29.82159   |
| dummy_year9 | 5.75        | 12.25531  | 0.47  | 0.639 | -18.26996 29.76996   |
| _cons       | -11.05      | 11.05     | -1.00 | 0.317 | -32.70761 10.60761   |

. tab country, gen(dummy\_country)

| Country  | Freq. | Percent | Cum.   |
|----------|-------|---------|--------|
| China    | 4     | 40.00   | 40.00  |
| India    | 2     | 20.00   | 60.00  |
| Korea    | 1     | 10.00   | 70.00  |
| Mexico   | 1     | 10.00   | 80.00  |
| Thailand | 2     | 20.00   | 100.00 |
| Total    | 10    | 100.00  |        |

Successive values of tau^2 differ by less than 10^-4 :convergence achieved

|              | Coefficient | Std. err. | z     | P> z  | [95% conf. interval] |          |
|--------------|-------------|-----------|-------|-------|----------------------|----------|
| dummy_coun~1 | 10.20705    | 12.4777   | 0.82  | 0.413 | -14.24879            | 34.66288 |
| dummy_coun~2 | 9.816587    | 12.5828   | 0.78  | 0.435 | -14.84525            | 34.47843 |
| dummy_coun~3 | 13.09       | 12.41918  | 1.05  | 0.292 | -11.25114            | 37.43114 |
| dummy_coun~4 | (dropped)   |           |       |       |                      |          |
| dummy_coun~5 | 7.258723    | 12.92236  | 0.56  | 0.574 | -18.06864            | 32.58608 |
| _cons        | -12.39999   | 12.39999  | -1.00 | 0.317 | -36.70354            | 11.90355 |

. tab population, gen(dummy\_population)

| Population | Freq. | Percent | Cum.   |
|------------|-------|---------|--------|
| Adult      | 5     | 50.00   | 50.00  |
| Children   | 4     | 40.00   | 90.00  |
| Unknown    | 1     | 10.00   | 100.00 |
| Total      | 10    | 100.00  |        |

. metareg \_ES dummy\_population1 dummy\_population2 dummy\_population3, wsse(\_ES) bsest(rem1)  
Iteration 1: tau^2 = 0

Meta-analysis regression

|                  |      |
|------------------|------|
| No of studies =  | 10   |
| tau^2 method     | rem1 |
| tau^2 estimate = | 0    |

Successive values of tau^2 differ by less than 10^-4 :convergence achieved

|              | Coefficient | Std. err. | z     | P> z  | [95% conf. interval] |          |
|--------------|-------------|-----------|-------|-------|----------------------|----------|
| dummy_popu~1 | 3.425591    | 2.050994  | 1.67  | 0.095 | -.5942829            | 7.445464 |
| dummy_popu~2 | (dropped)   |           |       |       |                      |          |
| dummy_popu~3 | .7153841    | 3.17111   | 0.23  | 0.822 | -5.499876            | 6.930645 |
| _cons        | -3.215384   | 1.950881  | -1.65 | 0.099 | -7.03904             | .608272  |

. tab operation, gen(dummy\_operation)

| Operation             | Freq. | Percent | Cum.   |
|-----------------------|-------|---------|--------|
| Children oral therapy | 1     | 10.00   | 10.00  |
| ChildrenOral therapy  | 2     | 20.00   | 30.00  |
| Oral therapy          | 3     | 30.00   | 60.00  |
| Periodontal surgery   | 1     | 10.00   | 70.00  |
| Root canal therapy    | 1     | 10.00   | 80.00  |
| Teeth extraction      | 2     | 20.00   | 100.00 |
| Total                 | 10    | 100.00  |        |

```
. metareg _ES dummy_operation1 dummy_operation2 dummy_operation3 dummy_operation4 dummy_operation5 dummy_operation6, wsse(_ES) bbest(r
> em1)
Iteration 1: tau^2 = 0

Meta-analysis regression                                No of studies = 10
                                                         tau^2 method      rem1
                                                         tau^2 estimate = 0
```

Successive values of tau^2 differ by less than 10^-4 :convergence achieved

|              | Coefficient | Std. err. | z     | P> z  | [95% conf. interval] |          |
|--------------|-------------|-----------|-------|-------|----------------------|----------|
| dummy_oper~1 | 6.899994    | 21.07854  | 0.33  | 0.743 | -34.41319            | 48.21318 |
| dummy_oper~2 | 15.29437    | 18.06463  | 0.85  | 0.397 | -20.11167            | 50.7004  |
| dummy_oper~3 | 15.86448    | 18.00426  | 0.88  | 0.378 | -19.42323            | 51.15219 |
| dummy_oper~4 | 12.95       | 18.63337  | 0.69  | 0.487 | -23.57073            | 49.47073 |
| dummy_oper~5 | (dropped)   |           |       |       |                      |          |
| dummy_oper~6 | 18.58338    | 17.96318  | 1.03  | 0.301 | -16.6238             | 53.79056 |
| _cons        | -17.95      | 17.95     | -1.00 | 0.317 | -53.13134            | 17.23135 |

## Postoperative Diastolic Blood Pressure

```
. tab year, gen(dummy_year)
```

| Year  | Freq. | Percent | Cum.   |
|-------|-------|---------|--------|
| 2008  | 2     | 22.22   | 22.22  |
| 2011  | 1     | 11.11   | 33.33  |
| 2013  | 1     | 11.11   | 44.44  |
| 2014  | 1     | 11.11   | 55.56  |
| 2015  | 1     | 11.11   | 66.67  |
| 2018  | 1     | 11.11   | 77.78  |
| 2021  | 1     | 11.11   | 88.89  |
| 2022  | 1     | 11.11   | 100.00 |
| Total | 9     | 100.00  |        |

```
. metareg _ES dummy_year1 dummy_year2 dummy_year3 dummy_year4 dummy_year5 dummy_year6 dummy_year7 dummy_year8, wsse(_ES) bbest(rem1)
Iteration 1: tau^2 = 0
Iteration 2: tau^2 = 3.3858116
Iteration 3: tau^2 = 8.8272995
Iteration 4: tau^2 = 13.411665
Iteration 5: tau^2 = 15.293751
Iteration 6: tau^2 = 15.778457
Iteration 7: tau^2 = 15.883522
Iteration 8: tau^2 = 15.905334
Iteration 9: tau^2 = 15.909821
Iteration 10: tau^2 = 15.910742
Iteration 11: tau^2 = 15.910933
```

```
Meta-analysis regression                                No of studies = 9
                                                         tau^2 method      rem1
                                                         tau^2 estimate = 15.91
```

Successive values of tau^2 differ by less than 10^-4 :convergence achieved

|             | Coefficient | Std. err. | z     | P> z  | [95% conf. interval] |          |
|-------------|-------------|-----------|-------|-------|----------------------|----------|
| dummy_year1 | 9.918991    | 11.27591  | 0.88  | 0.379 | -12.18139            | 32.01937 |
| dummy_year2 | 7.09        | 11.67091  | 0.61  | 0.544 | -15.78455            | 29.96455 |
| dummy_year3 | 5.539997    | 12.13003  | 0.46  | 0.648 | -18.23442            | 29.31441 |
| dummy_year4 | 4.639996    | 12.47748  | 0.37  | 0.710 | -19.81542            | 29.09541 |
| dummy_year5 | -4.060001   | 17.94039  | -0.23 | 0.821 | -39.22252            | 31.10252 |
| dummy_year6 | (dropped)   |           |       |       |                      |          |
| dummy_year7 | 6.91        | 11.71462  | 0.59  | 0.555 | -16.05024            | 29.87024 |
| dummy_year8 | 7.940006    | 11.50033  | 0.69  | 0.490 | -14.60022            | 30.48023 |
| _cons       | -9.84       | 10.61775  | -0.93 | 0.354 | -30.6504             | 10.9704  |

| Country  | Freq. | Percent | Cum.   |
|----------|-------|---------|--------|
| China    | 4     | 44.44   | 44.44  |
| India    | 1     | 11.11   | 55.56  |
| Korea    | 1     | 11.11   | 66.67  |
| Mexico   | 1     | 11.11   | 77.78  |
| Thailand | 2     | 22.22   | 100.00 |
| Total    | 9     | 100.00  |        |

```
. metareg _ES dummy_country1 dummy_country2 dummy_country3 dummy_country4 dummy_country5, wsse(_ES) bsest(rem1)
Iteration 1: tau^2 = 0
```

```
Meta-analysis regression                                No of studies =    9
                                                         tau^2 method      rem1
                                                         tau^2 estimate =    0
```

Successive values of tau^2 differ by less than 10^-4 :convergence achieved

|              | Coefficient | Std. err. | z     | P> z  | [95% conf. interval] |
|--------------|-------------|-----------|-------|-------|----------------------|
| dummy_coun~1 | 3.273353    | 5.594654  | 0.59  | 0.558 | -7.691968 14.23867   |
| dummy_coun~2 | (dropped)   |           |       |       |                      |
| dummy_coun~3 | 2.450005    | 5.882393  | 0.42  | 0.677 | -9.079274 13.97928   |
| dummy_coun~4 | -8.699997   | 14.84083  | -0.59 | 0.558 | -37.78748 20.38749   |
| dummy_coun~5 | 2.995104    | 5.438877  | 0.55  | 0.582 | -7.664899 13.65511   |
| _cons        | -5.200005   | 5.200004  | -1.00 | 0.317 | -15.39183 4.991817   |

```
. tab population, gen (dummy_population)
```

| Population | Freq. | Percent | Cum.   |
|------------|-------|---------|--------|
| adult      | 5     | 55.56   | 55.56  |
| children   | 3     | 33.33   | 88.89  |
| unknown    | 1     | 11.11   | 100.00 |
| Total      | 9     | 100.00  |        |

```
. metareg _ES dummy_population1 dummy_population2 dummy_population3, wsse(_ES) bsest(rem1)
Iteration 1: tau^2 = 0
```

```
Meta-analysis regression                                No of studies =    9
                                                         tau^2 method      rem1
                                                         tau^2 estimate =    0
```

Successive values of tau^2 differ by less than 10^-4 :convergence achieved

|              | Coefficient | Std. err. | z     | P> z  | [95% conf. interval] |
|--------------|-------------|-----------|-------|-------|----------------------|
| dummy_popu~1 | .3513652    | 2.421951  | 0.15  | 0.885 | -4.395571 5.098301   |
| dummy_popu~2 | (dropped)   |           |       |       |                      |
| dummy_popu~3 | -.3708614   | 3.390189  | -0.11 | 0.913 | -7.01551 6.273787    |
| _cons        | -2.52914    | 1.755954  | -1.44 | 0.150 | -5.970746 .9124658   |

```
. tab operation, gen (dummy_operation)
```

| Operation             | Freq. | Percent | Cum.   |
|-----------------------|-------|---------|--------|
| Children oral therapy | 1     | 11.11   | 11.11  |
| ChildrenOral therapy  | 1     | 11.11   | 22.22  |
| Oral therapy          | 3     | 33.33   | 55.56  |
| Periodontal surgery   | 1     | 11.11   | 66.67  |
| Root canal therapy    | 1     | 11.11   | 77.78  |
| Teeth extraction      | 2     | 22.22   | 100.00 |
| Total                 | 9     | 100.00  |        |

```
. metareg _ES dummy_operation1 dummy_operation2 dummy_operation3 dummy_operation4 dummy_operation5 dummy_operation6, wsse(_ES) bsest(r
> em1)
Iteration 1: tau^2 = 0
```

```
Meta-analysis regression                                No of studies =    9
                                                         tau^2 method      reml
                                                         tau^2 estimate =    0
```

Successive values of tau^2 differ by less than 10^-4 :convergence achieved

|              | Coefficient | Std. err. | z     | P> z  | [95% conf. interval] |          |
|--------------|-------------|-----------|-------|-------|----------------------|----------|
| dummy_oper~1 | -14.25      | 10.78303  | -1.32 | 0.186 | -35.38435            | 6.884346 |
| dummy_oper~2 | -6.309998   | 4.801886  | -1.31 | 0.189 | -15.72152            | 3.101526 |
| dummy_oper~3 | -8.054537   | 5.006087  | -1.61 | 0.108 | -17.86629            | 1.757214 |
| dummy_oper~4 | -7.340004   | 5.294623  | -1.39 | 0.166 | -17.71727            | 3.037266 |
| dummy_oper~5 | (dropped)   |           |       |       |                      |          |
| dummy_oper~6 | -7.69546    | 5.035655  | -1.53 | 0.126 | -17.56516            | 2.174242 |
| _cons        | 4.410004    | 4.410004  | 1.00  | 0.317 | -4.233444            | 13.05345 |

## Postoperative Pain Score

```
. tab year, gen (dummy_year)
```

| Year  | Freq. | Percent | Cum.   |
|-------|-------|---------|--------|
| 2006  | 1     | 20.00   | 20.00  |
| 2011  | 1     | 20.00   | 40.00  |
| 2020  | 2     | 40.00   | 80.00  |
| 2021  | 1     | 20.00   | 100.00 |
| Total | 5     | 100.00  |        |

```
. metareg _ES dummy_year1 dummy_year2 dummy_year3 dummy_year4, wsse(_ES) bsest(reml)
Iteration 1: tau^2 = 0
```

```
Meta-analysis regression                                No of studies =    5
                                                         tau^2 method      reml
                                                         tau^2 estimate =    0
```

Successive values of tau^2 differ by less than 10^-4 :convergence achieved

|             | Coefficient | Std. err. | z     | P> z  | [95% conf. interval] |          |
|-------------|-------------|-----------|-------|-------|----------------------|----------|
| dummy_year1 | (dropped)   |           |       |       |                      |          |
| dummy_year2 | .4600003    | 1.589277  | 0.29  | 0.772 | -2.654925            | 3.574925 |
| dummy_year3 | 1.227098    | 1.333751  | 0.92  | 0.358 | -1.387005            | 3.841202 |
| dummy_year4 | -.5599997   | 2.31106   | -0.24 | 0.809 | -5.089595            | 3.969595 |
| _cons       | -1.33       | 1.33      | -1.00 | 0.317 | -3.936753            | 1.276752 |



```
. tab country, gen (dummy_country)
```

| Country | Freq. | Percent | Cum.   |
|---------|-------|---------|--------|
| Brazil  | 1     | 20.00   | 20.00  |
| China   | 4     | 80.00   | 100.00 |
| Total   | 5     | 100.00  |        |

```
.
.
. metareg _ES dummy_country1 dummy_country2, wsse(_ES) bsest(reml)
Iteration 1: tau^2 = 0
```

```
Meta-analysis regression                      No of studies =    5
                                              tau^2 method      reml
                                              tau^2 estimate =    0
```

Successive values of tau^2 differ by less than 10^-4 :convergence achieved

|              | Coefficient | Std. err. | z     | P> z  | [95% conf. interval] |          |
|--------------|-------------|-----------|-------|-------|----------------------|----------|
| dummy_coun~1 | 1.109972    | .6732345  | 1.65  | 0.099 | -.209543             | 2.429488 |
| dummy_coun~2 | (dropped)   |           |       |       |                      |          |
| _cons        | -1.209972   | .6657662  | -1.82 | 0.069 | -2.51485             | .0949055 |

```
. tab population, gen (dummy_population)
```

| Population | Freq. | Percent | Cum.   |
|------------|-------|---------|--------|
| Adult      | 3     | 60.00   | 60.00  |
| Children   | 1     | 20.00   | 80.00  |
| Unknown    | 1     | 20.00   | 100.00 |
| Total      | 5     | 100.00  |        |

```
. metareg _ES dummy_population1 dummy_population2 dummy_population3, wsse(_ES) bsest(reml)
Iteration 1: tau^2 = 0
```

```
Meta-analysis regression                      No of studies =    5
                                              tau^2 method      reml
                                              tau^2 estimate =    0
```

Successive values of tau^2 differ by less than 10^-4 :convergence achieved

|              | Coefficient | Std. err. | z     | P> z  | [95% conf. interval] |          |
|--------------|-------------|-----------|-------|-------|----------------------|----------|
| dummy_popu~1 | .1601602    | 1.536342  | 0.10  | 0.917 | -2.851016            | 3.171336 |
| dummy_popu~2 | 1.23        | 1.333754  | 0.92  | 0.356 | -1.38411             | 3.84411  |
| dummy_popu~3 | (dropped)   |           |       |       |                      |          |
| _cons        | -1.33       | 1.33      | -1.00 | 0.317 | -3.936753            | 1.276752 |

```
. tab operation, gen (dummy_operation)
```

| Operation              | Freq. | Percent | Cum.   |
|------------------------|-------|---------|--------|
| Pediatric Oral Therapy | 1     | 20.00   | 20.00  |
| Root canal therapy     | 1     | 20.00   | 40.00  |
| Tooth extraction       | 3     | 60.00   | 100.00 |
| Total                  | 5     | 100.00  |        |

```
. metareg _ES dummy_operation1 dummy_operation2 dummy_operation3, wsse(_ES) bsest(reml)
Iteration 1: tau^2 = 0
```

Meta-analysis regression

No of studies = 5  
tau^2 method reml  
tau^2 estimate = 0

Successive values of tau^2 differ by less than 10^-4 :convergence achieved

|              | Coefficient | Std. err. | z     | P> z  | [95% conf. interval] |          |
|--------------|-------------|-----------|-------|-------|----------------------|----------|
| dummy_oper~1 | 1.06984     | .7755304  | 1.38  | 0.168 | -.4501717            | 2.589852 |
| dummy_oper~2 | -.1601602   | 1.536342  | -0.10 | 0.917 | -3.171336            | 2.851016 |
| dummy_oper~3 | (dropped)   |           |       |       |                      |          |
| _cons        | -1.16984    | .7690562  | -1.52 | 0.128 | -2.677162            | .3374825 |

.
